# Supplementary material for: Global source attribution of sulfate concentration, direct and indirect radiative forcing
Source: Copernicus journal article supplement (doi:10.5194/acp-2017-303), 2017-04-04
Supplement: Supplementary file 1 [file acp-2017-303-supplement.pdf]

1 Supplement of  
2 Global source attribution of sulfate concentration, direct and  
3 indirect radiative forcing  
4  
5  
6

7 Yang Yang<sup>1\*</sup>, Hailong Wang<sup>1\*</sup>, Steven J. Smith<sup>2</sup>, Richard Easter<sup>1</sup>, Po-Lun Ma<sup>1</sup>, Yun  
8 Qian<sup>1</sup>, Hongbin Yu<sup>3</sup>, Can Li<sup>3,4</sup>, Philip J. Rasch<sup>1</sup>  
9  
10  
11

12 <sup>1</sup>Atmospheric Science and Global Change Division, Pacific Northwest National  
13 Laboratory, Richland, Washington, USA

14 <sup>2</sup>Joint Global Change Research Institute, Pacific Northwest National Laboratory,  
15 College Park, Maryland, USA

16 <sup>3</sup>NASA Goddard Space Flight Center, Greenbelt, Maryland, USA

17 <sup>4</sup>Earth System Science Interdisciplinary Center, University of Maryland, College Park,  
18 Maryland, USA  
19  
20

21 \*Correspondence to yang.yang@pnnl.gov and hailong.wang@pnnl.gov  
22  
23

24 **Table S1.** Relative contributions (%) from the sixteen tagged source regions/sectors  
 25 (S, column) to regional mean surface concentrations of sulfate over the fourteen  
 26 receptor regions and all globe (R, row) in December-January-February (DJF),  
 27 March-April-May (MAM), June-July-August (JJA), September-October-November  
 28 (SON), and annual mean (ANN).  
 29

| DJF   |      |      |      |      |      |      |      |      |      |      |      |      |      |      |      |
|-------|------|------|------|------|------|------|------|------|------|------|------|------|------|------|------|
| S \ R | NAM  | CAM  | SAM  | EUR  | NAF  | SAF  | MDE  | SEA  | CAS  | SAS  | EAS  | RBU  | PAN  | ROW  | TOT  |
| NAM   | 74.9 | 7.1  | 0.0  | 0.5  | 0.6  | 0.1  | 0.1  | 0.0  | 0.1  | 0.1  | 0.0  | 0.1  | 0.0  | 2.0  | 2.6  |
| CAM   | 5.8  | 45.3 | 1.2  | 0.1  | 0.3  | 0.1  | 0.1  | 0.0  | 0.0  | 0.1  | 0.0  | 0.0  | 0.0  | 2.0  | 1.8  |
| SAM   | 0.0  | 0.2  | 42.3 | 0.0  | 0.1  | 0.3  | 0.0  | 0.0  | 0.0  | 0.0  | 0.0  | 0.0  | 0.7  | 0.8  | 1.1  |
| EUR   | 0.4  | 0.4  | 0.4  | 59.7 | 16.1 | 3.2  | 8.2  | 0.1  | 6.8  | 0.8  | 0.5  | 11.2 | 0.0  | 1.9  | 3.5  |
| NAF   | 0.1  | 0.5  | 0.8  | 2.4  | 15.3 | 4.6  | 2.8  | 0.0  | 0.6  | 0.4  | 0.1  | 0.3  | 0.0  | 0.7  | 1.3  |
| SAF   | 0.0  | 1.4  | 4.5  | 0.1  | 1.1  | 35.1 | 0.4  | 0.1  | 0.1  | 0.2  | 0.0  | 0.0  | 2.8  | 1.9  | 2.9  |
| MDE   | 0.7  | 0.7  | 1.9  | 5.2  | 18.7 | 23.6 | 62.6 | 0.8  | 15.9 | 9.4  | 1.7  | 2.4  | 0.0  | 4.1  | 7.7  |
| SEA   | 0.0  | 0.1  | 0.1  | 0.0  | 0.0  | 0.1  | 0.0  | 12.2 | 0.0  | 0.8  | 1.2  | 0.0  | 0.6  | 1.7  | 1.7  |
| CAS   | 0.3  | 0.0  | 0.0  | 0.4  | 0.1  | 0.2  | 0.8  | 0.1  | 41.2 | 1.0  | 2.2  | 12.8 | 0.0  | 0.4  | 1.5  |
| SAS   | 1.4  | 0.8  | 0.3  | 0.3  | 0.7  | 3.5  | 1.1  | 11.3 | 2.4  | 74.4 | 8.2  | 0.3  | 0.1  | 12.4 | 13.1 |
| EAS   | 4.9  | 1.7  | 0.1  | 0.8  | 1.2  | 0.5  | 0.4  | 57.0 | 3.6  | 4.2  | 77.1 | 5.5  | 0.2  | 16.3 | 20.4 |
| RBU   | 0.6  | 0.0  | 0.0  | 7.7  | 0.6  | 0.2  | 1.0  | 0.1  | 20.8 | 0.1  | 2.8  | 54.7 | 0.0  | 1.2  | 3.0  |
| PAN   | 0.0  | 0.0  | 0.1  | 0.0  | 0.0  | 0.0  | 0.0  | 0.0  | 0.0  | 0.0  | 0.0  | 0.0  | 38.1 | 0.5  | 0.5  |
| ROW   | 6.3  | 17.0 | 13.4 | 12.0 | 14.6 | 14.6 | 16.1 | 11.7 | 4.9  | 6.7  | 4.8  | 10.0 | 17.3 | 13.9 | 12.2 |
| VOL   | 2.2  | 16.4 | 12.6 | 9.2  | 28.7 | 7.8  | 5.9  | 4.9  | 3.2  | 1.4  | 1.0  | 2.3  | 10.6 | 11.2 | 9.0  |
| DMS   | 2.4  | 8.4  | 22.3 | 1.6  | 1.8  | 6.1  | 0.5  | 1.5  | 0.3  | 0.6  | 0.2  | 0.4  | 29.6 | 29.0 | 17.7 |
| MAM   |      |      |      |      |      |      |      |      |      |      |      |      |      |      |      |
| S \ R | NAM  | CAM  | SAM  | EUR  | NAF  | SAF  | MDE  | SEA  | CAS  | SAS  | EAS  | RBU  | PAN  | ROW  | TOT  |
| NAM   | 55.6 | 4.0  | 0.0  | 1.0  | 1.3  | 0.2  | 0.5  | 0.0  | 0.6  | 0.3  | 0.2  | 0.5  | 0.0  | 2.2  | 2.8  |
| CAM   | 7.1  | 39.3 | 0.3  | 0.2  | 0.7  | 0.2  | 0.3  | 0.1  | 0.2  | 0.2  | 0.1  | 0.1  | 0.0  | 2.0  | 1.9  |
| SAM   | 0.0  | 0.8  | 58.2 | 0.0  | 0.0  | 0.4  | 0.0  | 0.0  | 0.0  | 0.0  | 0.0  | 0.0  | 0.7  | 1.8  | 2.3  |
| EUR   | 1.0  | 0.5  | 0.2  | 49.8 | 18.4 | 2.6  | 10.9 | 0.3  | 11.8 | 2.2  | 1.2  | 13.0 | 0.0  | 2.8  | 4.9  |
| NAF   | 0.2  | 0.5  | 0.2  | 2.2  | 12.8 | 2.8  | 3.0  | 0.1  | 1.2  | 0.9  | 0.2  | 0.5  | 0.0  | 0.7  | 1.4  |
| SAF   | 0.0  | 0.7  | 1.5  | 0.0  | 1.2  | 51.2 | 0.2  | 0.1  | 0.1  | 0.1  | 0.0  | 0.0  | 2.5  | 2.8  | 3.8  |
| MDE   | 2.2  | 1.3  | 0.3  | 2.2  | 5.8  | 7.7  | 47.9 | 2.7  | 15.0 | 19.2 | 3.2  | 3.2  | 0.0  | 4.3  | 6.8  |
| SEA   | 0.1  | 0.1  | 0.1  | 0.0  | 0.1  | 0.1  | 0.1  | 24.3 | 0.0  | 0.4  | 1.9  | 0.0  | 0.3  | 1.5  | 1.7  |
| CAS   | 0.8  | 0.2  | 0.0  | 0.4  | 0.2  | 0.1  | 1.1  | 0.2  | 26.1 | 2.6  | 2.3  | 7.8  | 0.0  | 0.5  | 1.4  |
| SAS   | 2.2  | 1.9  | 0.1  | 0.5  | 1.6  | 7.4  | 4.4  | 23.6 | 1.4  | 52.5 | 8.1  | 0.5  | 0.1  | 8.2  | 9.5  |
| EAS   | 11.1 | 4.0  | 0.1  | 1.6  | 2.2  | 0.6  | 1.0  | 20.0 | 2.8  | 1.2  | 68.6 | 8.5  | 0.1  | 12.2 | 15.6 |
| RBU   | 1.4  | 0.1  | 0.0  | 8.0  | 2.0  | 0.2  | 1.9  | 0.1  | 25.5 | 0.6  | 3.5  | 45.7 | 0.0  | 1.7  | 3.7  |
| PAN   | 0.0  | 0.0  | 0.1  | 0.0  | 0.0  | 0.0  | 0.0  | 0.2  | 0.0  | 0.0  | 0.0  | 0.0  | 47.7 | 0.7  | 0.7  |
| ROW   | 10.3 | 18.3 | 10.7 | 11.6 | 12.9 | 10.5 | 16.0 | 15.5 | 6.7  | 15.4 | 7.4  | 12.1 | 16.5 | 17.4 | 14.8 |
| VOL   | 4.0  | 19.9 | 16.0 | 17.6 | 37.2 | 8.1  | 12.0 | 9.8  | 7.3  | 3.1  | 2.8  | 5.6  | 7.5  | 13.5 | 12.0 |
| DMS   | 3.9  | 8.3  | 12.3 | 4.8  | 3.7  | 7.8  | 0.8  | 2.9  | 1.3  | 1.4  | 0.5  | 2.5  | 24.6 | 27.7 | 16.7 |
| JJA   |      |      |      |      |      |      |      |      |      |      |      |      |      |      |      |
| S \ R | NAM  | CAM  | SAM  | EUR  | NAF  | SAF  | MDE  | SEA  | CAS  | SAS  | EAS  | RBU  | PAN  | ROW  | TOT  |

|     |      |      |      |      |      |      |      |      |      |      |      |      |      |      |      |
|-----|------|------|------|------|------|------|------|------|------|------|------|------|------|------|------|
| NAM | 67.9 | 4.3  | 0.1  | 2.1  | 1.7  | 0.3  | 1.1  | 0.1  | 1.8  | 0.4  | 0.4  | 1.3  | 0.0  | 3.2  | 4.5  |
| CAM | 6.4  | 40.3 | 0.3  | 0.2  | 0.2  | 0.1  | 0.1  | 0.1  | 0.2  | 0.1  | 0.0  | 0.1  | 0.1  | 1.6  | 1.6  |
| SAM | 0.0  | 5.5  | 60.5 | 0.0  | 0.0  | 0.3  | 0.0  | 0.0  | 0.0  | 0.0  | 0.0  | 0.0  | 0.8  | 4.7  | 4.0  |
| EUR | 0.7  | 1.2  | 0.2  | 52.8 | 19.5 | 2.5  | 16.7 | 0.7  | 10.4 | 2.3  | 1.0  | 11.4 | 0.1  | 3.6  | 6.4  |
| NAF | 0.2  | 0.8  | 0.1  | 1.6  | 8.7  | 1.2  | 3.1  | 0.2  | 0.5  | 0.5  | 0.1  | 0.3  | 0.0  | 1.0  | 1.5  |
| SAF | 0.0  | 1.1  | 0.8  | 0.0  | 1.3  | 65.1 | 0.5  | 0.2  | 0.0  | 0.5  | 0.0  | 0.0  | 2.8  | 7.2  | 7.6  |
| MDE | 0.5  | 1.1  | 0.6  | 1.8  | 3.8  | 7.7  | 41.2 | 4.1  | 6.0  | 10.2 | 1.3  | 2.0  | 0.3  | 3.0  | 5.2  |
| SEA | 0.0  | 0.1  | 0.1  | 0.0  | 0.0  | 0.1  | 0.0  | 35.5 | 0.0  | 0.1  | 1.4  | 0.0  | 0.4  | 1.3  | 1.4  |
| CAS | 0.4  | 0.2  | 0.0  | 0.7  | 0.3  | 0.3  | 2.8  | 0.6  | 25.5 | 5.7  | 2.6  | 4.3  | 0.0  | 0.4  | 1.5  |
| SAS | 0.4  | 0.5  | 0.3  | 0.2  | 0.4  | 0.6  | 0.6  | 8.8  | 0.4  | 62.0 | 1.9  | 0.2  | 0.3  | 1.6  | 4.4  |
| EAS | 5.6  | 2.3  | 0.7  | 1.3  | 1.4  | 0.6  | 1.1  | 4.8  | 2.4  | 1.2  | 75.5 | 15.0 | 0.7  | 6.5  | 12.9 |
| RBU | 1.4  | 0.3  | 0.0  | 10.9 | 2.8  | 0.5  | 6.6  | 0.3  | 42.2 | 2.0  | 3.4  | 47.0 | 0.0  | 1.8  | 4.6  |
| PAN | 0.0  | 0.0  | 0.0  | 0.0  | 0.0  | 0.0  | 0.0  | 1.2  | 0.0  | 0.0  | 0.0  | 0.0  | 51.5 | 1.1  | 0.9  |
| ROW | 9.8  | 17.2 | 10.8 | 12.0 | 10.4 | 7.3  | 16.7 | 19.0 | 5.8  | 9.8  | 7.8  | 12.2 | 16.6 | 20.1 | 15.0 |
| VOL | 3.1  | 18.4 | 17.5 | 10.4 | 47.4 | 7.9  | 8.8  | 19.4 | 3.5  | 1.6  | 3.9  | 3.6  | 10.4 | 14.9 | 13.9 |
| DMS | 3.5  | 6.5  | 8.0  | 5.9  | 2.3  | 5.3  | 0.7  | 4.9  | 1.4  | 3.6  | 0.7  | 2.5  | 16.0 | 28.1 | 14.7 |

## SON

| S \ R | NAM  | CAM  | SAM  | EUR  | NAF  | SAF  | MDE  | SEA  | CAS  | SAS  | EAS  | RBU  | PAN  | ROW  | TOT  |
|-------|------|------|------|------|------|------|------|------|------|------|------|------|------|------|------|
| NAM   | 69.9 | 9.6  | 0.0  | 1.2  | 0.9  | 0.2  | 0.5  | 0.0  | 0.8  | 0.2  | 0.2  | 0.7  | 0.0  | 3.0  | 3.3  |
| CAM   | 5.0  | 42.5 | 0.3  | 0.1  | 0.1  | 0.1  | 0.1  | 0.0  | 0.1  | 0.0  | 0.0  | 0.1  | 0.2  | 1.6  | 1.5  |
| SAM   | 0.0  | 1.7  | 54.3 | 0.0  | 0.0  | 0.7  | 0.0  | 0.0  | 0.0  | 0.0  | 0.0  | 0.0  | 1.3  | 2.4  | 2.6  |
| EUR   | 0.7  | 0.7  | 0.2  | 53.1 | 16.3 | 3.6  | 9.4  | 0.1  | 10.0 | 1.2  | 0.9  | 15.1 | 0.1  | 3.1  | 5.2  |
| NAF   | 0.1  | 0.4  | 0.1  | 2.3  | 11.6 | 3.4  | 1.8  | 0.0  | 0.7  | 0.3  | 0.1  | 0.4  | 0.0  | 0.9  | 1.6  |
| SAF   | 0.0  | 3.0  | 7.2  | 0.0  | 0.4  | 38.6 | 0.1  | 0.1  | 0.0  | 0.1  | 0.0  | 0.0  | 7.0  | 4.5  | 4.6  |
| MDE   | 0.9  | 1.2  | 0.7  | 5.3  | 15.1 | 18.1 | 56.1 | 0.6  | 14.9 | 8.2  | 2.3  | 2.8  | 0.2  | 4.4  | 8.5  |
| SEA   | 0.0  | 0.0  | 0.1  | 0.0  | 0.0  | 0.1  | 0.0  | 17.7 | 0.0  | 0.9  | 0.7  | 0.0  | 0.6  | 1.5  | 1.4  |
| CAS   | 0.6  | 0.2  | 0.0  | 0.3  | 0.3  | 0.6  | 2.8  | 0.2  | 31.1 | 3.5  | 3.0  | 8.2  | 0.0  | 0.8  | 1.8  |
| SAS   | 0.9  | 0.7  | 0.3  | 0.3  | 0.8  | 4.9  | 3.0  | 4.1  | 1.0  | 71.9 | 3.3  | 0.2  | 0.3  | 8.5  | 10.7 |
| EAS   | 7.0  | 2.2  | 0.4  | 1.1  | 1.1  | 0.7  | 0.7  | 47.2 | 2.3  | 4.7  | 77.0 | 8.0  | 0.6  | 10.7 | 15.6 |
| RBU   | 0.9  | 0.2  | 0.0  | 9.7  | 1.9  | 0.5  | 2.4  | 0.1  | 28.4 | 0.5  | 2.6  | 48.7 | 0.0  | 1.6  | 3.3  |
| PAN   | 0.0  | 0.0  | 0.1  | 0.0  | 0.0  | 0.0  | 0.0  | 0.4  | 0.0  | 0.0  | 0.0  | 0.0  | 43.3 | 0.9  | 0.8  |
| ROW   | 7.4  | 17.1 | 13.4 | 11.5 | 13.3 | 12.9 | 16.9 | 15.4 | 5.9  | 6.6  | 7.1  | 11.0 | 15.6 | 17.6 | 14.1 |
| VOL   | 2.0  | 13.8 | 12.2 | 12.8 | 37.1 | 9.7  | 5.8  | 11.3 | 4.1  | 1.0  | 2.3  | 3.6  | 12.9 | 12.6 | 11.2 |
| DMS   | 4.6  | 6.8  | 10.5 | 2.3  | 1.2  | 5.8  | 0.5  | 2.5  | 0.8  | 1.0  | 0.4  | 1.2  | 17.8 | 26.0 | 13.7 |

## ANN

| S \ R | NAM  | CAM  | SAM  | EUR  | NAF  | SAF  | MDE  | SEA  | CAS  | SAS  | EAS | RBU  | PAN | ROW | TOT |
|-------|------|------|------|------|------|------|------|------|------|------|-----|------|-----|-----|-----|
| NAM   | 66.5 | 6.2  | 0.0  | 1.3  | 1.2  | 0.2  | 0.6  | 0.0  | 0.8  | 0.2  | 0.2 | 0.7  | 0.0 | 2.5 | 3.2 |
| CAM   | 6.2  | 42.0 | 0.5  | 0.2  | 0.3  | 0.2  | 0.1  | 0.0  | 0.1  | 0.1  | 0.0 | 0.1  | 0.1 | 1.8 | 1.7 |
| SAM   | 0.0  | 2.0  | 55.0 | 0.0  | 0.0  | 0.4  | 0.0  | 0.0  | 0.0  | 0.0  | 0.0 | 0.0  | 0.9 | 2.2 | 2.5 |
| EUR   | 0.7  | 0.7  | 0.2  | 53.4 | 17.7 | 3.0  | 11.3 | 0.2  | 9.8  | 1.5  | 0.9 | 12.6 | 0.0 | 2.8 | 5.0 |
| NAF   | 0.2  | 0.6  | 0.2  | 2.1  | 11.4 | 3.0  | 2.6  | 0.1  | 0.8  | 0.5  | 0.1 | 0.4  | 0.0 | 0.8 | 1.5 |
| SAF   | 0.0  | 1.5  | 3.5  | 0.0  | 1.0  | 47.7 | 0.3  | 0.1  | 0.0  | 0.2  | 0.0 | 0.0  | 3.9 | 3.8 | 4.6 |
| MDE   | 1.0  | 1.1  | 0.8  | 3.5  | 10.0 | 14.5 | 51.9 | 1.6  | 13.2 | 11.3 | 2.1 | 2.6  | 0.1 | 4.0 | 7.1 |
| SEA   | 0.1  | 0.1  | 0.1  | 0.0  | 0.0  | 0.1  | 0.0  | 19.3 | 0.0  | 0.6  | 1.3 | 0.0  | 0.5 | 1.5 | 1.5 |

|     |     |      |      |      |      |      |      |      |      |      |      |      |      |      |      |
|-----|-----|------|------|------|------|------|------|------|------|------|------|------|------|------|------|
| CAS | 0.5 | 0.1  | 0.0  | 0.4  | 0.2  | 0.3  | 2.0  | 0.2  | 31.0 | 3.1  | 2.5  | 8.1  | 0.0  | 0.5  | 1.6  |
| SAS | 1.2 | 1.0  | 0.3  | 0.3  | 0.8  | 3.9  | 2.3  | 11.9 | 1.3  | 66.3 | 5.4  | 0.3  | 0.2  | 8.1  | 9.6  |
| EAS | 7.2 | 2.6  | 0.4  | 1.3  | 1.4  | 0.6  | 0.8  | 39.6 | 2.8  | 3.1  | 74.5 | 9.5  | 0.4  | 11.8 | 16.2 |
| RBU | 1.1 | 0.2  | 0.0  | 9.1  | 2.0  | 0.4  | 3.0  | 0.1  | 28.8 | 0.7  | 3.1  | 48.8 | 0.0  | 1.6  | 3.6  |
| PAN | 0.0 | 0.0  | 0.1  | 0.0  | 0.0  | 0.0  | 0.0  | 0.3  | 0.0  | 0.0  | 0.0  | 0.0  | 44.7 | 0.8  | 0.7  |
| ROW | 8.7 | 17.5 | 12.0 | 11.8 | 12.4 | 11.3 | 16.5 | 14.4 | 5.8  | 9.2  | 6.7  | 11.3 | 16.5 | 17.0 | 14.0 |
| VOL | 2.9 | 17.1 | 14.7 | 12.8 | 39.3 | 8.4  | 8.0  | 9.6  | 4.6  | 1.7  | 2.5  | 3.9  | 10.5 | 12.9 | 11.5 |
| DMS | 3.7 | 7.5  | 12.3 | 3.8  | 2.1  | 6.1  | 0.6  | 2.5  | 0.9  | 1.5  | 0.4  | 1.7  | 22.2 | 27.8 | 15.7 |

---

31 **Table S2.** Relative contributions (%) from the sixteen tagged source regions/sectors  
 32 (S, column) to regional mean column burden of sulfate over the fourteen receptor  
 33 regions and all globe (R, row) in December-January-February (DJF),  
 34 March-April-May (MAM), June-July-August (JJA), September-October-November  
 35 (SON), and annual mean (ANN).  
 36

|       |      | DJF  |      |      |      |      |      |      |      |      |      |      |      |      |      |
|-------|------|------|------|------|------|------|------|------|------|------|------|------|------|------|------|
| S \ R | NAM  | CAM  | SAM  | EUR  | NAF  | SAF  | MDE  | SEA  | CAS  | SAS  | EAS  | RBU  | PAN  | ROW  | TOT  |
| NAM   | 25.2 | 3.5  | 0.0  | 1.6  | 1.0  | 0.1  | 0.3  | 0.0  | 0.7  | 0.2  | 0.2  | 1.0  | 0.0  | 1.3  | 1.5  |
| CAM   | 5.0  | 27.5 | 0.8  | 0.8  | 1.3  | 0.3  | 0.5  | 0.1  | 0.4  | 0.3  | 0.2  | 0.5  | 0.1  | 1.8  | 1.7  |
| SAM   | 0.3  | 1.1  | 27.2 | 0.2  | 1.0  | 1.3  | 0.3  | 0.1  | 0.1  | 0.2  | 0.1  | 0.1  | 2.6  | 2.2  | 2.2  |
| EUR   | 1.4  | 0.4  | 0.3  | 36.0 | 10.0 | 2.5  | 7.4  | 0.1  | 12.6 | 1.0  | 1.6  | 14.6 | 0.0  | 1.6  | 2.8  |
| NAF   | 0.4  | 0.5  | 0.5  | 2.7  | 9.3  | 4.0  | 3.1  | 0.1  | 2.0  | 0.6  | 0.4  | 1.2  | 0.0  | 0.7  | 1.2  |
| SAF   | 0.5  | 1.9  | 4.5  | 0.4  | 5.5  | 34.5 | 1.5  | 0.4  | 0.4  | 0.7  | 0.2  | 0.2  | 11.3 | 5.4  | 5.9  |
| MDE   | 3.2  | 1.0  | 1.5  | 4.5  | 17.3 | 22.4 | 53.3 | 1.2  | 22.7 | 11.4 | 4.9  | 6.6  | 0.1  | 4.0  | 7.2  |
| SEA   | 1.1  | 0.7  | 0.6  | 0.6  | 0.7  | 0.4  | 0.3  | 11.9 | 0.4  | 0.9  | 1.6  | 0.5  | 2.1  | 2.1  | 1.9  |
| CAS   | 0.5  | 0.0  | 0.0  | 0.3  | 0.1  | 0.2  | 0.5  | 0.1  | 12.8 | 0.6  | 2.0  | 6.3  | 0.0  | 0.4  | 0.8  |
| SAS   | 16.3 | 2.9  | 1.0  | 7.1  | 3.6  | 3.8  | 2.6  | 14.5 | 7.0  | 66.6 | 16.1 | 9.3  | 1.0  | 11.9 | 13.1 |
| EAS   | 22.9 | 3.8  | 1.1  | 7.5  | 3.8  | 0.9  | 1.9  | 46.7 | 6.2  | 4.4  | 60.2 | 16.6 | 1.3  | 16.3 | 17.7 |
| RBU   | 0.6  | 0.0  | 0.0  | 4.0  | 0.4  | 0.1  | 0.8  | 0.1  | 9.7  | 0.1  | 1.9  | 18.4 | 0.0  | 0.8  | 1.4  |
| PAN   | 0.0  | 0.1  | 0.3  | 0.0  | 0.0  | 0.1  | 0.0  | 0.1  | 0.0  | 0.0  | 0.0  | 0.0  | 28.4 | 0.8  | 0.8  |
| ROW   | 8.3  | 12.8 | 8.5  | 13.0 | 13.8 | 13.3 | 16.0 | 12.3 | 9.5  | 8.1  | 5.7  | 9.9  | 14.2 | 11.0 | 10.8 |
| VOL   | 7.9  | 32.0 | 37.5 | 17.0 | 25.1 | 9.3  | 8.9  | 8.7  | 13.3 | 3.0  | 3.6  | 11.8 | 14.4 | 17.3 | 15.2 |
| DMS   | 6.3  | 11.9 | 16.1 | 4.4  | 7.1  | 7.0  | 2.6  | 3.5  | 2.3  | 1.9  | 1.3  | 3.0  | 24.4 | 22.2 | 15.9 |

  

|       |      | MAM  |      |      |      |      |      |      |      |      |      |      |      |      |      |
|-------|------|------|------|------|------|------|------|------|------|------|------|------|------|------|------|
| S \ R | NAM  | CAM  | SAM  | EUR  | NAF  | SAF  | MDE  | SEA  | CAS  | SAS  | EAS  | RBU  | PAN  | ROW  | TOT  |
| NAM   | 23.2 | 2.6  | 0.0  | 2.9  | 2.3  | 0.4  | 1.0  | 0.1  | 1.6  | 0.5  | 0.5  | 1.6  | 0.0  | 2.1  | 2.4  |
| CAM   | 5.4  | 26.1 | 0.6  | 1.0  | 2.0  | 0.6  | 0.7  | 0.2  | 0.7  | 0.4  | 0.3  | 0.5  | 0.1  | 2.1  | 1.9  |
| SAM   | 0.2  | 1.0  | 38.9 | 0.1  | 0.3  | 1.2  | 0.1  | 0.1  | 0.1  | 0.1  | 0.1  | 0.1  | 2.6  | 1.9  | 2.1  |
| EUR   | 2.2  | 0.6  | 0.2  | 34.8 | 13.3 | 3.5  | 9.4  | 0.4  | 14.2 | 2.6  | 2.6  | 14.3 | 0.0  | 2.6  | 4.4  |
| NAF   | 0.5  | 0.5  | 0.3  | 2.7  | 10.2 | 4.0  | 3.5  | 0.3  | 2.2  | 1.1  | 0.6  | 1.3  | 0.1  | 0.8  | 1.5  |
| SAF   | 0.3  | 0.9  | 2.3  | 0.2  | 1.8  | 35.6 | 0.5  | 0.3  | 0.2  | 0.3  | 0.1  | 0.2  | 9.7  | 4.1  | 4.1  |
| MDE   | 7.0  | 2.5  | 0.4  | 3.8  | 7.7  | 11.0 | 44.4 | 4.7  | 22.9 | 22.9 | 8.7  | 8.2  | 0.2  | 6.2  | 8.8  |
| SEA   | 0.7  | 0.7  | 0.7  | 0.3  | 0.4  | 0.4  | 0.2  | 18.9 | 0.3  | 0.4  | 2.1  | 0.3  | 2.4  | 2.0  | 1.9  |
| CAS   | 1.8  | 0.4  | 0.0  | 0.6  | 0.2  | 0.1  | 1.0  | 0.3  | 11.8 | 2.5  | 3.3  | 5.4  | 0.0  | 1.0  | 1.5  |
| SAS   | 10.4 | 6.4  | 0.9  | 4.3  | 4.5  | 8.1  | 5.7  | 30.4 | 3.9  | 46.8 | 15.4 | 4.1  | 1.0  | 12.4 | 12.8 |
| EAS   | 27.0 | 9.0  | 0.9  | 6.6  | 4.9  | 1.3  | 2.4  | 14.0 | 4.7  | 1.7  | 50.3 | 17.6 | 1.0  | 17.4 | 16.9 |
| RBU   | 1.8  | 0.2  | 0.0  | 6.0  | 1.4  | 0.3  | 1.5  | 0.1  | 13.8 | 0.7  | 3.6  | 23.4 | 0.0  | 1.7  | 2.8  |
| PAN   | 0.0  | 0.0  | 0.2  | 0.0  | 0.0  | 0.0  | 0.0  | 0.2  | 0.0  | 0.0  | 0.0  | 0.0  | 28.1 | 0.6  | 0.5  |
| ROW   | 8.1  | 13.0 | 8.5  | 10.3 | 12.0 | 10.7 | 14.5 | 14.5 | 8.5  | 13.8 | 6.9  | 8.9  | 13.5 | 11.2 | 10.9 |
| VOL   | 7.4  | 27.0 | 32.4 | 21.4 | 33.6 | 14.4 | 13.3 | 11.6 | 13.2 | 4.5  | 4.5  | 11.0 | 17.8 | 16.7 | 15.4 |
| DMS   | 4.1  | 9.1  | 13.7 | 5.0  | 5.2  | 8.2  | 1.8  | 3.9  | 2.0  | 1.7  | 1.1  | 3.1  | 23.4 | 17.3 | 12.1 |

  

|       |     | JJA |     |     |     |     |     |     |     |     |     |     |     |     |     |
|-------|-----|-----|-----|-----|-----|-----|-----|-----|-----|-----|-----|-----|-----|-----|-----|
| S \ R | NAM | CAM | SAM | EUR | NAF | SAF | MDE | SEA | CAS | SAS | EAS | RBU | PAN | ROW | TOT |

|     |      |      |      |      |      |      |      |      |      |      |      |      |      |      |      |
|-----|------|------|------|------|------|------|------|------|------|------|------|------|------|------|------|
| NAM | 44.3 | 8.7  | 0.4  | 6.9  | 2.7  | 0.7  | 1.5  | 0.2  | 4.3  | 0.8  | 0.9  | 3.9  | 0.2  | 4.7  | 5.0  |
| CAM | 6.6  | 28.7 | 2.0  | 0.7  | 0.4  | 0.4  | 0.2  | 0.1  | 0.5  | 0.1  | 0.1  | 0.4  | 1.0  | 2.2  | 1.9  |
| SAM | 0.1  | 3.8  | 37.7 | 0.0  | 0.0  | 0.4  | 0.0  | 0.0  | 0.0  | 0.0  | 0.0  | 0.0  | 1.7  | 2.6  | 2.3  |
| EUR | 1.5  | 1.6  | 0.7  | 37.1 | 15.7 | 5.8  | 12.9 | 0.7  | 13.7 | 2.9  | 2.1  | 13.5 | 0.5  | 3.8  | 6.2  |
| NAF | 0.2  | 1.0  | 0.3  | 2.2  | 7.0  | 2.6  | 2.4  | 0.2  | 0.8  | 0.5  | 0.2  | 0.6  | 0.2  | 1.2  | 1.6  |
| SAF | 0.1  | 1.1  | 1.2  | 0.1  | 0.6  | 33.4 | 0.2  | 0.2  | 0.1  | 0.3  | 0.0  | 0.1  | 3.9  | 5.0  | 4.7  |
| MDE | 1.2  | 2.0  | 2.3  | 2.6  | 9.6  | 19.4 | 39.9 | 4.0  | 12.0 | 11.5 | 2.7  | 3.6  | 2.3  | 6.3  | 8.5  |
| SEA | 0.4  | 0.3  | 0.9  | 0.2  | 0.2  | 0.5  | 0.2  | 18.9 | 0.2  | 0.4  | 1.2  | 0.3  | 3.2  | 1.6  | 1.3  |
| CAS | 1.3  | 0.4  | 0.2  | 0.9  | 0.6  | 1.0  | 3.5  | 0.8  | 13.9 | 7.7  | 4.2  | 5.0  | 0.3  | 1.3  | 2.1  |
| SAS | 4.2  | 2.9  | 2.7  | 3.5  | 3.8  | 3.5  | 7.4  | 15.0 | 5.4  | 52.7 | 8.5  | 3.4  | 5.5  | 6.3  | 7.7  |
| EAS | 21.8 | 8.0  | 5.4  | 8.7  | 4.7  | 4.3  | 5.2  | 22.0 | 8.2  | 8.0  | 65.2 | 20.8 | 13.6 | 20.0 | 19.2 |
| RBU | 3.1  | 0.5  | 0.2  | 9.6  | 2.6  | 1.4  | 5.4  | 0.4  | 28.2 | 2.5  | 4.7  | 32.5 | 0.2  | 2.6  | 4.5  |
| PAN | 0.0  | 0.0  | 0.1  | 0.0  | 0.0  | 0.0  | 0.0  | 0.7  | 0.0  | 0.0  | 0.0  | 0.0  | 18.6 | 0.5  | 0.4  |
| ROW | 7.9  | 14.0 | 9.6  | 9.4  | 9.4  | 9.5  | 13.6 | 14.1 | 5.9  | 8.0  | 6.0  | 8.3  | 12.6 | 11.3 | 10.3 |
| VOL | 4.1  | 20.4 | 27.1 | 13.6 | 41.0 | 12.7 | 6.6  | 17.6 | 5.2  | 1.9  | 3.1  | 5.4  | 22.9 | 18.0 | 16.3 |
| DMS | 3.3  | 6.6  | 9.1  | 4.4  | 1.9  | 4.3  | 0.9  | 5.2  | 1.7  | 2.5  | 0.9  | 2.2  | 13.4 | 12.9 | 8.1  |

## SON

| S \ R | NAM  | CAM  | SAM  | EUR  | NAF  | SAF  | MDE  | SEA  | CAS  | SAS  | EAS  | RBU  | PAN  | ROW  | TOT  |
|-------|------|------|------|------|------|------|------|------|------|------|------|------|------|------|------|
| NAM   | 31.5 | 7.5  | 0.2  | 3.7  | 1.3  | 0.3  | 0.8  | 0.1  | 2.7  | 0.3  | 0.7  | 2.8  | 0.2  | 2.6  | 2.8  |
| CAM   | 4.7  | 29.0 | 1.3  | 0.8  | 0.5  | 0.4  | 0.3  | 0.1  | 0.6  | 0.2  | 0.2  | 0.6  | 0.7  | 2.0  | 1.7  |
| SAM   | 0.1  | 2.1  | 39.6 | 0.0  | 0.1  | 1.3  | 0.0  | 0.1  | 0.0  | 0.0  | 0.0  | 0.1  | 3.2  | 3.0  | 2.9  |
| EUR   | 1.7  | 1.0  | 0.3  | 33.4 | 12.3 | 4.1  | 8.6  | 0.2  | 12.7 | 1.6  | 2.1  | 13.7 | 0.2  | 2.6  | 4.3  |
| NAF   | 0.3  | 0.5  | 0.2  | 2.8  | 8.7  | 3.4  | 2.1  | 0.1  | 1.4  | 0.5  | 0.3  | 0.8  | 0.1  | 0.9  | 1.5  |
| SAF   | 0.1  | 3.1  | 6.1  | 0.1  | 0.6  | 29.2 | 0.2  | 0.2  | 0.1  | 0.1  | 0.1  | 0.1  | 12.5 | 6.9  | 5.9  |
| MDE   | 2.8  | 1.9  | 1.2  | 5.1  | 21.3 | 21.5 | 51.2 | 1.0  | 20.7 | 11.1 | 5.1  | 5.1  | 0.8  | 5.4  | 9.7  |
| SEA   | 0.6  | 0.4  | 0.7  | 0.3  | 0.2  | 0.5  | 0.2  | 14.3 | 0.3  | 1.1  | 1.0  | 0.4  | 2.7  | 1.9  | 1.6  |
| CAS   | 1.3  | 0.2  | 0.1  | 0.5  | 0.4  | 0.8  | 2.5  | 0.3  | 13.1 | 4.0  | 3.7  | 5.8  | 0.1  | 1.0  | 1.6  |
| SAS   | 14.2 | 4.3  | 1.9  | 7.5  | 3.4  | 5.8  | 6.1  | 9.9  | 7.8  | 63.9 | 10.8 | 10.5 | 3.1  | 11.8 | 12.6 |
| EAS   | 25.1 | 5.8  | 2.9  | 9.1  | 3.1  | 2.4  | 2.6  | 40.3 | 8.4  | 6.3  | 62.1 | 20.5 | 5.4  | 16.5 | 16.7 |
| RBU   | 1.3  | 0.2  | 0.1  | 5.9  | 1.5  | 0.7  | 2.0  | 0.1  | 14.9 | 0.7  | 2.5  | 22.1 | 0.1  | 1.3  | 2.1  |
| PAN   | 0.0  | 0.0  | 0.2  | 0.0  | 0.0  | 0.0  | 0.0  | 0.4  | 0.0  | 0.0  | 0.0  | 0.0  | 26.1 | 0.9  | 0.8  |
| ROW   | 7.2  | 14.3 | 9.8  | 10.7 | 12.5 | 12.3 | 16.1 | 14.8 | 7.9  | 7.3  | 7.2  | 8.3  | 12.2 | 11.6 | 11.1 |
| VOL   | 4.2  | 21.4 | 25.6 | 16.7 | 32.4 | 12.2 | 6.2  | 14.2 | 7.5  | 1.6  | 3.2  | 6.9  | 18.9 | 16.8 | 14.9 |
| DMS   | 4.9  | 8.4  | 9.8  | 3.3  | 1.9  | 5.0  | 1.1  | 3.9  | 1.9  | 1.4  | 1.0  | 2.5  | 13.7 | 15.0 | 9.7  |

## ANN

| S \ R | NAM  | CAM  | SAM  | EUR  | NAF  | SAF  | MDE  | SEA  | CAS  | SAS  | EAS | RBU  | PAN | ROW | TOT |
|-------|------|------|------|------|------|------|------|------|------|------|-----|------|-----|-----|-----|
| NAM   | 32.6 | 5.6  | 0.2  | 4.2  | 2.0  | 0.4  | 1.0  | 0.1  | 2.5  | 0.4  | 0.6 | 2.5  | 0.1 | 2.7 | 3.0 |
| CAM   | 5.6  | 27.9 | 1.2  | 0.8  | 0.8  | 0.4  | 0.4  | 0.1  | 0.6  | 0.2  | 0.2 | 0.5  | 0.5 | 2.0 | 1.8 |
| SAM   | 0.1  | 2.0  | 36.5 | 0.1  | 0.2  | 1.0  | 0.1  | 0.1  | 0.1  | 0.1  | 0.0 | 0.1  | 2.6 | 2.4 | 2.4 |
| EUR   | 1.7  | 0.9  | 0.4  | 35.3 | 13.6 | 4.2  | 10.2 | 0.3  | 13.4 | 2.1  | 2.1 | 13.9 | 0.2 | 2.7 | 4.6 |
| NAF   | 0.3  | 0.7  | 0.3  | 2.6  | 8.3  | 3.4  | 2.6  | 0.1  | 1.5  | 0.7  | 0.4 | 0.9  | 0.1 | 0.9 | 1.5 |
| SAF   | 0.2  | 1.7  | 3.6  | 0.2  | 1.3  | 32.9 | 0.4  | 0.3  | 0.2  | 0.3  | 0.1 | 0.1  | 9.6 | 5.3 | 5.1 |
| MDE   | 3.5  | 1.9  | 1.4  | 3.9  | 13.7 | 19.1 | 46.0 | 2.5  | 19.0 | 14.3 | 5.3 | 5.8  | 0.9 | 5.5 | 8.6 |
| SEA   | 0.6  | 0.5  | 0.7  | 0.3  | 0.3  | 0.5  | 0.2  | 15.6 | 0.3  | 0.7  | 1.5 | 0.4  | 2.6 | 1.9 | 1.6 |

|     |      |      |      |      |      |      |      |      |      |      |      |      |      |      |      |
|-----|------|------|------|------|------|------|------|------|------|------|------|------|------|------|------|
| CAS | 1.3  | 0.3  | 0.1  | 0.6  | 0.4  | 0.6  | 2.2  | 0.3  | 12.9 | 3.9  | 3.4  | 5.5  | 0.1  | 0.9  | 1.6  |
| SAS | 10.1 | 4.2  | 1.7  | 5.3  | 3.7  | 5.1  | 6.0  | 17.5 | 5.8  | 57.2 | 12.5 | 6.1  | 2.7  | 10.5 | 11.4 |
| EAS | 24.2 | 6.8  | 2.8  | 8.1  | 4.1  | 2.5  | 3.4  | 31.9 | 6.9  | 5.2  | 59.4 | 19.1 | 5.4  | 17.6 | 17.7 |
| RBU | 1.9  | 0.2  | 0.1  | 6.8  | 1.8  | 0.7  | 3.0  | 0.2  | 17.8 | 1.0  | 3.3  | 25.2 | 0.1  | 1.6  | 2.8  |
| PAN | 0.0  | 0.0  | 0.2  | 0.0  | 0.0  | 0.0  | 0.0  | 0.3  | 0.0  | 0.0  | 0.0  | 0.0  | 25.2 | 0.7  | 0.6  |
| ROW | 7.8  | 13.6 | 9.2  | 10.5 | 11.3 | 11.4 | 14.9 | 13.8 | 7.7  | 9.3  | 6.4  | 8.7  | 13.1 | 11.2 | 10.7 |
| VOL | 5.6  | 24.9 | 29.9 | 17.1 | 35.5 | 12.1 | 8.2  | 12.7 | 9.5  | 2.7  | 3.6  | 8.4  | 18.6 | 17.2 | 15.5 |
| DMS | 4.4  | 8.8  | 11.8 | 4.3  | 2.9  | 5.8  | 1.4  | 4.0  | 1.9  | 1.9  | 1.1  | 2.7  | 18.3 | 16.7 | 11.1 |

---

38 **Table S3.** Seasonal and annual regional concentration efficiency of sulfate (unit:  $\mu\text{g}$   
39  $\text{m}^{-3}$  ( $\text{Tg S yr}^{-1}$ )<sup>-1</sup>) of the sixteen tagged source regions/sectors. The efficiency is  
40 defined as the local near-surface sulfate concentration divided by the corresponding  
41 sulfur emissions from that region (seasonal emissions multiplied by 4). The receptor  
42 region of ROW is used to calculate efficiency of VOL and DMS.  
43

|     | DJF       | MAM       | JJA       | SON       | ANN       |
|-----|-----------|-----------|-----------|-----------|-----------|
| NAM | 1.375E-01 | 1.633E-01 | 2.261E-01 | 1.911E-01 | 1.798E-01 |
| CAM | 4.734E-01 | 3.909E-01 | 3.750E-01 | 4.128E-01 | 4.119E-01 |
| SAM | 1.968E-01 | 3.265E-01 | 3.142E-01 | 3.157E-01 | 2.943E-01 |
| EUR | 2.311E-01 | 3.409E-01 | 4.641E-01 | 3.656E-01 | 3.343E-01 |
| NAF | 4.062E-01 | 4.395E-01 | 5.183E-01 | 6.584E-01 | 5.091E-01 |
| SAF | 2.228E-01 | 2.912E-01 | 3.705E-01 | 2.523E-01 | 2.892E-01 |
| MDE | 8.592E-01 | 6.589E-01 | 6.410E-01 | 1.019E+00 | 7.956E-01 |
| SEA | 4.393E-01 | 5.008E-01 | 4.084E-01 | 4.276E-01 | 4.429E-01 |
| CAS | 6.683E-01 | 5.279E-01 | 5.034E-01 | 5.725E-01 | 5.749E-01 |
| SAS | 7.929E-01 | 4.776E-01 | 5.040E-01 | 9.765E-01 | 6.868E-01 |
| EAS | 2.091E-01 | 2.103E-01 | 2.461E-01 | 2.366E-01 | 2.237E-01 |
| RBU | 1.810E-01 | 2.166E-01 | 2.534E-01 | 1.984E-01 | 2.094E-01 |
| PAN | 4.016E-01 | 4.558E-01 | 3.519E-01 | 3.750E-01 | 3.922E-01 |
| ROW | 1.094E-02 | 1.275E-02 | 1.177E-02 | 1.112E-02 | 1.163E-02 |
| VOL | 8.075E-03 | 8.591E-03 | 7.508E-03 | 7.139E-03 | 7.832E-03 |
| DMS | 1.082E-02 | 1.179E-02 | 1.274E-02 | 1.182E-02 | 1.166E-02 |

44  
45



46 **Table S4.** Contributions ( $\text{mW m}^{-2}$ ) from tagged source regions/sectors (S, column) to  
 47 regional mean direct radiative forcing of sulfate over the fourteen receptor regions and all  
 48 globe (R, row).  
 49

|       |       | DJF    |       |       |       |        |        |        |       |        |        |       |       |        |       |
|-------|-------|--------|-------|-------|-------|--------|--------|--------|-------|--------|--------|-------|-------|--------|-------|
| S \ R | NAM   | CAM    | SAM   | EUR   | NAF   | SAF    | MDE    | SEA    | CAS   | SAS    | EAS    | RBU   | PAN   | ROW    | TOT   |
| NAM   | -42.9 | -17.7  | -0.5  | -2.0  | -2.5  | -0.5   | -1.3   | -1.2   | -0.5  | -1.3   | -0.3   | -0.8  | 1.5   | -4.7   | -5.3  |
| CAM   | -8.2  | -150.4 | -2.7  | -0.4  | -3.9  | -1.4   | -2.6   | -1.6   | 0.0   | -3.0   | -0.5   | -0.3  | 1.3   | -9.4   | -9.2  |
| SAM   | 0.0   | -5.1   | -84.7 | 0.9   | -3.3  | -7.2   | -1.6   | -2.0   | 0.8   | -2.5   | 0.2    | 0.0   | -4.9  | -8.4   | -9.3  |
| EUR   | -0.9  | -3.0   | -1.2  | -80.2 | -24.8 | -11.6  | -50.7  | -2.1   | -26.5 | -11.5  | -11.1  | -13.8 | 1.6   | -4.4   | -6.8  |
| NAF   | 0.1   | -3.7   | -1.9  | -4.2  | -22.3 | -17.5  | -19.0  | -1.5   | -3.4  | -6.1   | -1.9   | -1.0  | 1.6   | -3.0   | -3.8  |
| SAF   | -0.2  | -10.0  | -13.4 | 0.5   | -16.3 | -198.2 | -10.3  | -4.5   | 0.2   | -9.5   | -0.9   | -0.1  | -26.2 | -20.8  | -24.3 |
| MDE   | -3.4  | -5.9   | -4.5  | -8.6  | -46.8 | -122.8 | -326.0 | -11.0  | -48.8 | -132.9 | -35.9  | -6.3  | 1.3   | -14.7  | -23.0 |
| SEA   | -0.9  | -3.8   | -2.0  | 0.2   | -2.1  | -2.0   | -1.4   | -106.4 | 0.1   | -13.5  | -10.1  | -0.4  | -3.2  | -8.3   | -8.0  |
| CAS   | 0.0   | -1.3   | -0.4  | 0.6   | 0.1   | -0.9   | -2.5   | -1.9   | -28.5 | -6.5   | -13.1  | -7.3  | 1.6   | -1.0   | -1.6  |
| SAS   | -19.2 | -14.2  | -2.9  | -12.1 | -11.9 | -22.9  | -19.3  | -118.0 | -14.1 | -754.6 | -98.9  | -9.5  | -0.6  | -42.3  | -45.7 |
| EAS   | -28.0 | -19.0  | -2.8  | -13.0 | -11.9 | -4.8   | -14.2  | -333.5 | -11.9 | -63.2  | -382.8 | -15.1 | -1.1  | -45.4  | -49.3 |
| RBU   | -0.2  | -1.3   | -0.4  | -7.4  | -0.6  | -0.5   | -5.0   | -1.6   | -19.5 | -0.8   | -13.6  | -22.4 | 1.6   | -1.3   | -2.3  |
| PAN   | 0.5   | -1.4   | -1.3  | 1.3   | 0.2   | -0.2   | 1.2    | -2.3   | 1.1   | 0.7    | 1.2    | 0.2   | -72.4 | -3.8   | -4.0  |
| ROW   | -10.6 | -71.7  | -27.1 | -25.9 | -39.1 | -76.1  | -103.7 | -105.2 | -20.1 | -108.6 | -36.5  | -10.2 | -35.0 | -44.3  | -44.2 |
| VOL   | -8.2  | -114.5 | -65.2 | -31.7 | -61.4 | -27.5  | -58.7  | -77.3  | -27.2 | -30.5  | -23.9  | -11.1 | -8.4  | -10.1  | -16.7 |
| DMS   | -7.8  | -57.1  | -51.8 | -8.0  | -22.9 | -42.0  | -20.6  | -35.4  | -4.4  | -29.0  | -9.5   | -2.9  | -62.3 | -118.6 | -95.9 |

  

|       |        | MAM    |        |        |        |        |        |        |        |        |        |        |       |       |       |
|-------|--------|--------|--------|--------|--------|--------|--------|--------|--------|--------|--------|--------|-------|-------|-------|
| S \ R | NAM    | CAM    | SAM    | EUR    | NAF    | SAF    | MDE    | SEA    | CAS    | SAS    | EAS    | RBU    | PAN   | ROW   | TOT   |
| NAM   | -110.8 | -16.7  | 0.1    | -22.1  | -8.4   | -0.9   | -8.3   | -2.1   | -11.9  | -7.1   | -2.6   | -8.5   | 1.9   | -10.1 | -12.4 |
| CAM   | -21.5  | -161.7 | -1.4   | -5.2   | -7.4   | -1.9   | -5.8   | -2.6   | -2.4   | -7.1   | 0.2    | -0.7   | 1.6   | -11.5 | -11.6 |
| SAM   | 0.9    | -5.5   | -137.8 | 2.0    | 0.2    | -5.4   | 1.0    | -2.4   | 3.2    | -1.1   | 2.9    | 1.8    | -3.6  | -9.2  | -11.1 |
| EUR   | -7.5   | -4.0   | -0.3   | -275.9 | -47.6  | -11.4  | -91.3  | -4.4   | -131.2 | -41.1  | -32.0  | -86.9  | 1.9   | -10.7 | -18.4 |
| NAF   | -0.6   | -3.6   | -0.5   | -16.8  | -33.4  | -12.4  | -28.5  | -3.3   | -14.4  | -17.6  | -3.9   | -4.5   | 1.8   | -3.7  | -5.0  |
| SAF   | 0.4    | -5.4   | -6.7   | 1.3    | -6.0   | -194.9 | -3.0   | -4.1   | 2.3    | -5.1   | 2.1    | 1.4    | -18.5 | -17.3 | -20.6 |
| MDE   | -26.1  | -14.5  | -1.0   | -24.3  | -29.1  | -43.3  | -346.8 | -34.4  | -169.7 | -354.5 | -94.3  | -38.7  | 1.6   | -21.7 | -31.8 |
| SEA   | -1.4   | -4.5   | -1.5   | 0.4    | -0.2   | -1.5   | -0.2   | -174.0 | 1.6    | -7.6   | -16.0  | 0.6    | -3.1  | -8.9  | -9.1  |
| CAS   | -6.5   | -3.0   | 0.2    | -2.7   | 0.9    | 0.1    | -7.3   | -3.5   | -92.8  | -38.2  | -39.8  | -27.2  | 1.9   | -3.3  | -5.6  |
| SAS   | -39.2  | -35.7  | -2.0   | -28.4  | -19.6  | -36.4  | -50.7  | -228.9 | -30.0  | -758.8 | -126.2 | -18.6  | -0.1  | -47.3 | -53.6 |
| EAS   | -108.2 | -51.1  | -1.9   | -48.4  | -21.0  | -4.8   | -24.4  | -105.8 | -39.7  | -30.2  | -446.0 | -70.1  | 0.0   | -58.4 | -63.3 |
| RBU   | -6.6   | -1.7   | 0.2    | -48.9  | -3.3   | -0.6   | -13.3  | -2.5   | -135.2 | -10.4  | -48.7  | -142.3 | 1.9   | -5.4  | -11.3 |
| PAN   | 1.5    | -0.9   | -0.3   | 2.7    | 1.8    | 0.3    | 2.4    | -3.6   | 3.9    | 0.7    | 3.6    | 2.3    | -61.8 | -3.1  | -3.0  |
| ROW   | -34.2  | -83.0  | -28.6  | -80.5  | -45.0  | -46.3  | -119.0 | -130.5 | -67.8  | -237.0 | -66.2  | -53.3  | -28.0 | -53.4 | -55.5 |
| VOL   | -22.7  | -119.6 | -74.1  | -138.9 | -105.9 | -38.0  | -116.9 | -96.2  | -109.0 | -61.6  | -47.6  | -53.9  | -15.7 | -27.3 | -36.6 |
| DMS   | -15.5  | -50.1  | -42.8  | -40.9  | -21.7  | -40.5  | -16.9  | -39.5  | -14.2  | -31.6  | -8.9   | -16.4  | -49.6 | -92.6 | -76.8 |

  

|       |        | JJA    |      |       |       |      |       |      |       |       |       |       |      |       |       |
|-------|--------|--------|------|-------|-------|------|-------|------|-------|-------|-------|-------|------|-------|-------|
| S \ R | NAM    | CAM    | SAM  | EUR   | NAF   | SAF  | MDE   | SEA  | CAS   | SAS   | EAS   | RBU   | PAN  | ROW   | TOT   |
| NAM   | -301.1 | -53.1  | -0.4 | -81.8 | -30.0 | -2.7 | -25.4 | -3.2 | -53.4 | -13.1 | -15.4 | -38.1 | 1.1  | -20.9 | -30.2 |
| CAM   | -42.1  | -173.0 | -7.1 | -6.6  | -2.2  | -1.8 | -2.1  | -2.9 | -4.1  | -2.2  | -1.3  | -2.0  | -0.5 | -10.1 | -11.4 |

|     |        |       |        |        |        |        |        |        |        |        |        |        |       |       |       |
|-----|--------|-------|--------|--------|--------|--------|--------|--------|--------|--------|--------|--------|-------|-------|-------|
| SAM | 0.7    | -25.3 | -166.8 | 1.0    | 2.4    | -1.5   | 1.5    | -2.4   | 1.6    | -0.1   | 0.8    | 1.4    | -1.7  | -10.2 | -12.8 |
| EUR | -8.8   | -10.4 | -1.8   | -433.3 | -145.7 | -32.8  | -182.3 | -6.1   | -168.0 | -43.1  | -33.9  | -134.7 | 0.4   | -16.4 | -30.3 |
| NAF | -0.4   | -7.0  | -0.2   | -22.2  | -63.6  | -12.4  | -28.8  | -3.4   | -7.4   | -7.3   | -1.5   | -4.0   | 1.1   | -5.0  | -6.6  |
| SAF | 0.4    | -8.4  | -4.6   | 0.5    | -3.6   | -220.3 | -1.1   | -3.2   | 1.2    | -4.3   | 0.5    | 1.1    | -6.3  | -17.6 | -21.5 |
| MDE | -7.2   | -12.3 | -8.4   | -26.6  | -112.1 | -112.7 | -507.0 | -23.6  | -126.5 | -155.3 | -39.8  | -31.3  | -3.4  | -21.3 | -33.3 |
| SEA | -1.1   | -2.9  | -2.5   | -1.3   | 0.3    | -2.1   | -2.1   | -124.5 | -1.2   | -6.3   | -18.4  | -0.6   | -5.3  | -7.0  | -7.4  |
| CAS | -7.6   | -3.5  | 0.4    | -9.0   | -4.5   | -5.0   | -55.0  | -5.8   | -153.9 | -112.7 | -67.4  | -43.6  | 1.0   | -5.3  | -10.3 |
| SAS | -24.9  | -15.0 | -10.2  | -38.7  | -46.7  | -20.4  | -156.2 | -65.7  | -65.0  | -730.1 | -109.8 | -26.8  | -10.5 | -22.2 | -33.8 |
| EAS | -144.4 | -44.8 | -21.2  | -98.5  | -56.8  | -25.7  | -108.2 | -92.5  | -102.6 | -111.7 | -910.8 | -150.3 | -28.6 | -73.6 | -93.8 |
| RBU | -19.7  | -4.2  | 0.4    | -108.0 | -23.2  | -7.4   | -84.7  | -4.1   | -344.2 | -38.1  | -84.5  | -306.7 | 1.2   | -10.8 | -25.2 |
| PAN | 1.1    | -1.4  | 1.1    | 1.3    | 2.6    | 1.5    | 1.6    | -9.1   | 2.0    | 0.1    | 1.0    | 1.8    | -39.8 | -3.0  | -2.7  |
| ROW | -52.4  | -85.8 | -42.8  | -111.0 | -93.4  | -57.8  | -169.8 | -91.2  | -70.1  | -115.4 | -99.0  | -83.5  | -26.1 | -52.9 | -58.5 |
| VOL | -17.4  | -91.7 | -95.4  | -120.3 | -375.9 | -64.1  | -85.1  | -118.8 | -53.1  | -7.4   | -50.6  | -39.8  | -34.4 | -36.2 | -49.4 |
| DMS | -21.3  | -39.4 | -38.6  | -54.4  | -17.7  | -27.5  | -13.7  | -35.4  | -19.5  | -38.2  | -14.7  | -20.8  | -27.3 | -68.4 | -58.1 |

SON

| S/R | NAM    | CAM    | SAM    | EUR    | NAF    | SAF    | MDE    | SEA    | CAS    | SAS     | EAS    | RBU   | PAN   | ROW   | TOT   |
|-----|--------|--------|--------|--------|--------|--------|--------|--------|--------|---------|--------|-------|-------|-------|-------|
| NAM | -132.6 | -43.4  | -0.2   | -25.3  | -11.1  | -1.2   | -10.2  | -2.8   | -20.1  | -7.9    | -8.4   | -10.8 | 1.7   | -11.2 | -14.7 |
| CAM | -18.8  | -153.4 | -4.5   | -3.9   | -3.5   | -1.6   | -3.2   | -3.0   | -2.7   | -4.8    | -1.7   | -0.8  | 0.2   | -8.8  | -9.3  |
| SAM | 0.8    | -9.7   | -176.8 | 0.8    | 0.4    | -9.0   | 0.5    | -2.8   | 1.8    | -1.9    | 1.2    | 1.2   | -7.1  | -10.3 | -13.4 |
| EUR | -5.1   | -5.3   | -0.8   | -211.7 | -93.9  | -24.1  | -112.0 | -3.7   | -91.5  | -32.6   | -26.7  | -48.4 | 1.6   | -9.7  | -17.1 |
| NAF | -0.1   | -3.3   | -0.2   | -15.4  | -63.9  | -18.2  | -27.8  | -2.7   | -7.5   | -10.4   | -3.0   | -1.5  | 1.9   | -3.5  | -5.5  |
| SAF | 0.6    | -15.7  | -28.6  | 0.5    | -4.3   | -205.3 | -1.5   | -4.2   | 1.6    | -3.9    | 0.9    | 1.0   | -34.5 | -23.4 | -26.6 |
| MDE | -8.8   | -9.5   | -4.7   | -25.4  | -185.3 | -141.3 | -609.1 | -10.0  | -127.7 | -212.0  | -59.4  | -16.3 | -0.2  | -18.8 | -35.5 |
| SEA | -1.1   | -2.3   | -2.3   | -0.7   | -0.8   | -2.4   | -2.8   | -132.0 | -0.1   | -24.2   | -9.6   | 0.1   | -5.7  | -7.9  | -8.1  |
| CAS | -4.0   | -1.9   | 0.2    | -1.9   | -2.5   | -4.7   | -30.3  | -4.4   | -81.4  | -75.5   | -44.2  | -19.3 | 1.8   | -3.4  | -6.2  |
| SAS | -48.2  | -19.6  | -7.1   | -39.8  | -35.3  | -40.8  | -95.8  | -68.5  | -54.9  | -1187.2 | -109.3 | -31.1 | -6.8  | -40.2 | -52.7 |
| EAS | -93.9  | -28.3  | -11.2  | -52.7  | -29.9  | -14.8  | -44.6  | -327.8 | -62.8  | -132.9  | -569.4 | -61.6 | -13.4 | -54.7 | -67.1 |
| RBU | -4.2   | -1.8   | 0.2    | -39.8  | -10.3  | -3.4   | -26.3  | -3.3   | -107.9 | -14.0   | -32.6  | -84.3 | 1.9   | -4.2  | -8.4  |
| PAN | 1.0    | -0.7   | -0.5   | 1.0    | 1.4    | 0.7    | 1.2    | -7.7   | 2.0    | -1.3    | 1.5    | 1.3   | -79.2 | -4.3  | -4.4  |
| ROW | -27.0  | -74.8  | -45.2  | -63.5  | -105.5 | -84.2  | -192.2 | -135.8 | -51.9  | -152.6  | -79.4  | -29.4 | -36.3 | -50.7 | -55.8 |
| VOL | -9.3   | -70.0  | -81.0  | -91.7  | -242.9 | -59.1  | -80.0  | -133.1 | -47.6  | -20.8   | -36.0  | -18.2 | -36.7 | -25.5 | -36.1 |
| DMS | -17.8  | -40.7  | -44.5  | -19.5  | -17.8  | -35.3  | -16.5  | -40.5  | -11.7  | -31.3   | -11.2  | -7.1  | -42.0 | -78.4 | -65.3 |

ANN

| S/R | NAM    | CAM    | SAM    | EUR    | NAF   | SAF    | MDE    | SEA    | CAS    | SAS    | EAS    | RBU   | PAN   | ROW   | TOT   |
|-----|--------|--------|--------|--------|-------|--------|--------|--------|--------|--------|--------|-------|-------|-------|-------|
| NAM | -146.6 | -32.6  | -0.2   | -32.8  | -13.0 | -1.3   | -11.3  | -2.3   | -21.5  | -7.3   | -6.6   | -14.5 | 1.6   | -11.7 | -15.6 |
| CAM | -22.8  | -159.4 | -3.9   | -4.0   | -4.2  | -1.7   | -3.4   | -2.5   | -2.3   | -4.3   | -0.8   | -0.9  | 0.7   | -9.9  | -10.4 |
| SAM | 0.6    | -11.4  | -142.0 | 1.2    | 0.0   | -5.8   | 0.4    | -2.4   | 1.9    | -1.4   | 1.3    | 1.1   | -4.4  | -9.5  | -11.7 |
| EUR | -5.6   | -5.6   | -1.0   | -250.0 | -78.1 | -20.0  | -109.2 | -4.1   | -104.5 | -32.1  | -25.9  | -70.9 | 1.4   | -10.3 | -18.1 |
| NAF | -0.2   | -4.3   | -0.7   | -14.7  | -46.0 | -15.2  | -25.9  | -2.7   | -8.1   | -10.4  | -2.6   | -2.7  | 1.6   | -3.8  | -5.3  |
| SAF | 0.3    | -9.7   | -13.2  | 0.7    | -7.7  | -205.6 | -4.0   | -4.0   | 1.3    | -5.7   | 0.7    | 0.8   | -21.4 | -19.8 | -23.3 |
| MDE | -11.4  | -10.5  | -4.6   | -21.3  | -93.8 | -105.6 | -447.2 | -19.7  | -118.2 | -213.4 | -57.3  | -23.2 | -0.2  | -19.1 | -30.9 |
| SEA | -1.1   | -3.4   | -2.1   | -0.4   | -0.7  | -2.0   | -1.7   | -133.9 | 0.1    | -12.9  | -13.5  | -0.1  | -4.4  | -8.0  | -8.2  |
| CAS | -4.5   | -2.4   | 0.1    | -3.2   | -1.5  | -2.6   | -23.8  | -3.9   | -89.1  | -58.3  | -41.2  | -24.4 | 1.6   | -3.3  | -5.9  |
| SAS | -32.9  | -21.2  | -5.6   | -29.8  | -28.5 | -30.2  | -80.6  | -119.6 | -41.1  | -857.8 | -111.3 | -21.5 | -4.5  | -38.1 | -46.5 |

|     |       |       |       |       |        |       |        |        |        |        |        |        |       |       |       |
|-----|-------|-------|-------|-------|--------|-------|--------|--------|--------|--------|--------|--------|-------|-------|-------|
| EAS | -93.7 | -35.8 | -9.3  | -53.2 | -30.0  | -12.6 | -47.9  | -213.6 | -54.4  | -84.9  | -577.5 | -74.3  | -10.9 | -57.8 | -68.2 |
| RBU | -7.7  | -2.2  | 0.1   | -50.9 | -9.4   | -3.0  | -32.3  | -2.8   | -151.8 | -15.8  | -44.9  | -138.9 | 1.7   | -5.4  | -11.8 |
| PAN | 1.0   | -1.1  | -0.3  | 1.6   | 1.5    | 0.6   | 1.6    | -5.6   | 2.2    | 0.0    | 1.8    | 1.4    | -63.1 | -3.5  | -3.5  |
| ROW | -31.0 | -78.7 | -36.0 | -70.2 | -71.0  | -66.4 | -146.4 | -115.1 | -52.5  | -153.3 | -70.1  | -44.0  | -31.5 | -50.3 | -53.5 |
| VOL | -14.5 | -98.0 | -78.8 | -95.8 | -196.9 | -47.4 | -84.8  | -107.6 | -59.2  | -30.1  | -39.5  | -30.8  | -24.1 | -24.9 | -34.8 |
| DMS | -15.6 | -46.5 | -44.5 | -30.7 | -20.0  | -36.3 | -17.0  | -37.7  | -12.5  | -32.5  | -11.1  | -11.8  | -45.4 | -89.5 | -74.1 |

---

50 **Table S5.** Direct and indirect radiative forcing of sulfate ( $\text{mW m}^{-2}$ ) averaged over land  
 51 and ocean of the Northern and Southern Hemisphere from emissions in the sixteen  
 52 tagged regions/sectors.  
 53

| Direct radiative forcing ( $\text{mW m}^{-2}$ ) |         |          |         |          |  |
|-------------------------------------------------|---------|----------|---------|----------|--|
| S \ R                                           | Land-NH | Ocean-NH | Land-SH | Ocean-SH |  |
| NAM                                             | -35.5   | -28.4    | 0.0     | -0.7     |  |
| CAM                                             | -10.2   | -22.6    | -1.7    | -2.1     |  |
| SAM                                             | -0.4    | -3.0     | -47.9   | -16.5    |  |
| EUR                                             | -50.2   | -28.2    | -0.7    | -1.2     |  |
| NAF                                             | -12.2   | -8.3     | -0.5    | -1.0     |  |
| SAF                                             | -9.5    | -9.5     | -72.0   | -30.8    |  |
| MDE                                             | -82.9   | -44.8    | -6.1    | -4.8     |  |
| SEA                                             | -6.0    | -12.4    | -2.7    | -6.5     |  |
| CAS                                             | -20.3   | -7.2     | 0.1     | -0.6     |  |
| SAS                                             | -89.7   | -83.0    | -5.7    | -8.4     |  |
| EAS                                             | -122.1  | -128.5   | -8.1    | -10.3    |  |
| RBU                                             | -44.0   | -13.4    | 0.1     | -0.6     |  |
| PAN                                             | 1.1     | -0.4     | -10.0   | -6.6     |  |
| ROW                                             | -62.6   | -91.3    | -23.0   | -25.0    |  |
| VOL                                             | -57.0   | -59.2    | -40.8   | -5.7     |  |
| DMS                                             | -17.6   | -88.0    | -29.6   | -91.8    |  |

  

| Indirect radiative forcing ( $\text{mW m}^{-2}$ ) |         |          |         |          |  |
|---------------------------------------------------|---------|----------|---------|----------|--|
| S \ R                                             | Land-NH | Ocean-NH | Land-SH | Ocean-SH |  |
| NAM                                               | -33.3   | -25.9    | 0.0     | -0.1     |  |
| CAM                                               | -3.3    | -13.6    | -0.3    | -1.2     |  |
| SAM                                               | 0.1     | -4.3     | -39.2   | -27.6    |  |
| EUR                                               | -4.0    | -10.6    | -0.1    | -0.3     |  |
| NAF                                               | 0.8     | -2.4     | -0.1    | -0.1     |  |
| SAF                                               | -1.5    | -2.4     | -15.7   | -31.3    |  |
| MDE                                               | 7.0     | -4.1     | -0.8    | -1.8     |  |
| SEA                                               | 0.2     | -5.5     | -0.3    | -5.1     |  |
| CAS                                               | -4.7    | -3.2     | 0.0     | -0.1     |  |
| SAS                                               | 0.4     | -8.5     | -0.4    | -4.4     |  |
| EAS                                               | -15.2   | -70.7    | -0.6    | -3.2     |  |
| RBU                                               | -18.4   | -12.0    | 0.0     | -0.1     |  |
| PAN                                               | 0.0     | -0.1     | -24.0   | -16.9    |  |
| ROW                                               | -6.7    | -61.9    | -15.9   | -42.7    |  |
| VOL                                               | -1.3    | -65.0    | -20.9   | -76.7    |  |
| DMS                                               | -2.4    | -113.7   | -26.5   | -445.2   |  |

54 **Table S6.** Seasonal and annual sulfate direct and indirect radiative forcing efficiency  
55 ( $\text{mW m}^{-2} (\text{Tg S yr}^{-1})^{-1}$ ) for the sixteen tagged source regions/sectors in this study and  
56 from Stjern et al. (2016). The radiative efficiency is defined as the sulfate radiative  
57 forcing divided by the corresponding scaled annual sulfur emission (seasonal  
58 emission multiplied by 4).  
59

|     | Direct radiative forcing efficiency   |            |            |            |            | Stjern et al. (2016) |
|-----|---------------------------------------|------------|------------|------------|------------|----------------------|
|     | DJF                                   | MAM        | JJA        | SON        | ANN        |                      |
| NAM | -1.596E+00                            | -4.423E+00 | -8.607E+00 | -5.203E+00 | -5.014E+00 | -4.500E+00           |
| CAM | -6.639E+00                            | -7.896E+00 | -7.614E+00 | -6.559E+00 | -7.205E+00 |                      |
| SAM | -7.090E+00                            | -7.568E+00 | -6.759E+00 | -7.702E+00 | -7.287E+00 |                      |
| EUR | -1.578E+00                            | -5.576E+00 | -1.173E+01 | -5.455E+00 | -5.448E+00 | -5.600E+00           |
| NAF | -6.330E+00                            | -8.222E+00 | -1.076E+01 | -9.086E+00 | -8.614E+00 |                      |
| SAF | -9.320E+00                            | -8.754E+00 | -6.636E+00 | -1.000E+01 | -8.577E+00 |                      |
| MDE | -6.852E+00                            | -9.455E+00 | -9.900E+00 | -1.062E+01 | -9.212E+00 | -1.030E+01           |
| SEA | -5.650E+00                            | -6.117E+00 | -5.234E+00 | -5.784E+00 | -5.699E+00 |                      |
| CAS | -1.290E+00                            | -5.143E+00 | -1.120E+01 | -5.937E+00 | -5.503E+00 |                      |
| SAS | -7.167E+00                            | -8.241E+00 | -5.271E+00 | -8.261E+00 | -7.251E+00 | -7.900E+00           |
| EAS | -2.445E+00                            | -3.589E+00 | -5.743E+00 | -3.904E+00 | -3.826E+00 | -4.400E+00           |
| RBU | -6.330E-01                            | -3.793E+00 | -9.750E+00 | -3.034E+00 | -3.962E+00 | -3.600E+00           |
| PAN | -7.974E+00                            | -5.600E+00 | -4.226E+00 | -6.795E+00 | -6.039E+00 |                      |
| ROW | -3.895E+00                            | -5.004E+00 | -5.337E+00 | -4.957E+00 | -4.790E+00 |                      |
| VOL | -3.556E+00                            | -4.372E+00 | -4.604E+00 | -4.440E+00 | -2.759E+00 |                      |
| DMS | -1.844E+00                            | -2.910E+00 | -4.133E+00 | -3.559E+00 | -4.065E+00 |                      |
|     | Indirect radiative forcing efficiency |            |            |            |            |                      |
|     | DJF                                   | MAM        | JJA        | SON        | ANN        |                      |
| NAM | -3.556E+00                            | -2.946E+01 | -3.971E+01 | -1.843E+01 | -2.276E+01 |                      |
| CAM | -1.573E+01                            | -2.137E+01 | -2.196E+01 | -1.837E+01 | -1.978E+01 |                      |
| SAM | -5.435E+01                            | -4.943E+01 | -1.540E+01 | -5.763E+01 | -5.027E+01 |                      |
| EUR | 1.380E+00                             | -1.167E+01 | -1.446E+01 | -2.496E+00 | -6.587E+00 |                      |
| NAF | -2.094E+00                            | -9.185E+00 | -5.883E+00 | -3.237E+00 | -6.233E+00 |                      |
| SAF | -1.924E+01                            | -1.928E+01 | -1.540E+01 | -4.440E+01 | -2.866E+01 |                      |
| MDE | -2.049E+00                            | -5.580E+00 | -2.128E+00 | 3.821E+00  | -1.689E+00 |                      |
| SEA | -8.144E+00                            | -1.266E+01 | -1.973E+01 | -1.556E+01 | -1.415E+01 |                      |
| CAS | 2.357E+00                             | -9.993E+00 | -1.281E+01 | -4.329E+00 | -8.724E+00 |                      |
| SAS | -3.351E+00                            | -6.880E+00 | -3.670E+00 | 6.634E-02  | -3.688E+00 |                      |
| EAS | -1.542E+00                            | -8.715E+00 | -1.303E+01 | -4.603E+00 | -7.842E+00 |                      |
| RBU | 4.934E+00                             | -1.204E+01 | -3.876E+01 | -3.135E+00 | -1.181E+01 |                      |
| PAN | -9.605E+01                            | -6.219E+01 | -6.330E+01 | -7.505E+01 | -7.725E+01 |                      |
| ROW | -1.209E+01                            | -1.957E+01 | -2.711E+01 | -1.586E+01 | -1.860E+01 |                      |
| VOL | -2.349E+01                            | -1.851E+01 | -2.141E+01 | -2.244E+01 | -2.246E+01 |                      |
| DMS | -9.346E+01                            | -4.747E+01 | -4.006E+01 | -7.307E+01 | -6.317E+01 |                      |

60 **Table S7.** Seasonal and annual global burden efficiency of sulfate (unit:  $\text{mg m}^{-3}$  ( $\text{Tg S}$   
61  $\text{yr}^{-1}$ )<sup>-1</sup>) of the sixteen tagged source regions/sectors. The efficiency of a source region  
62 is defined as the source region's global column burden of sulfate divided by the  
63 corresponding sulfur emissions from that region (seasonal emissions multiplied by 4).  
64

|     | DJF       | MAM       | JJA       | SON       | ANN       |
|-----|-----------|-----------|-----------|-----------|-----------|
| NAM | 1.580E-02 | 3.497E-02 | 6.675E-02 | 4.154E-02 | 4.016E-02 |
| CAM | 4.198E-02 | 5.527E-02 | 5.873E-02 | 5.039E-02 | 5.190E-02 |
| SAM | 5.665E-02 | 5.814E-02 | 5.652E-02 | 6.983E-02 | 6.071E-02 |
| EUR | 2.260E-02 | 5.558E-02 | 1.121E-01 | 5.829E-02 | 5.651E-02 |
| NAF | 6.690E-02 | 9.899E-02 | 1.250E-01 | 1.076E-01 | 9.982E-02 |
| SAF | 7.737E-02 | 7.360E-02 | 6.845E-02 | 9.397E-02 | 7.805E-02 |
| MDE | 7.338E-02 | 1.093E-01 | 1.191E-01 | 1.228E-01 | 1.062E-01 |
| SEA | 4.661E-02 | 5.195E-02 | 4.290E-02 | 4.773E-02 | 4.736E-02 |
| CAS | 2.132E-02 | 5.776E-02 | 1.082E-01 | 6.499E-02 | 5.965E-02 |
| SAS | 7.003E-02 | 8.190E-02 | 5.644E-02 | 8.355E-02 | 7.317E-02 |
| EAS | 2.997E-02 | 4.004E-02 | 5.510E-02 | 4.094E-02 | 4.085E-02 |
| RBU | 1.324E-02 | 3.899E-02 | 8.126E-02 | 3.210E-02 | 3.882E-02 |
| PAN | 5.377E-02 | 4.213E-02 | 2.894E-02 | 4.985E-02 | 4.300E-02 |
| ROW | 3.241E-02 | 4.091E-02 | 4.395E-02 | 4.172E-02 | 3.969E-02 |
| VOL | 2.959E-02 | 3.575E-02 | 3.791E-02 | 3.737E-02 | 3.517E-02 |
| DMS | 2.260E-02 | 2.635E-02 | 2.704E-02 | 2.608E-02 | 2.520E-02 |

65 **Table S8.** Annual sulfate incremental indirect radiative forcing calculated based on  
66 simulations with and without 20% reduction in sulfur emissions globally and sulfate  
67 indirect radiative forcing ( $W m^{-2}$ ) calculated based on simulation between present-day  
68 and preindustrial conditions, as well as these forcing efficiencies ( $mW m^{-2} (Tg S yr^{-1})^{-1}$ )  
69 for the sixteen tagged source regions/sectors.  
70  
71

|                            | Forcing    |       |       |       |       |       |       |       |
|----------------------------|------------|-------|-------|-------|-------|-------|-------|-------|
|                            | NAM        | CAM   | SAM   | EUR   | NAF   | SAF   | MDE   | SEA   |
| Incremental IRF            | -0.01      | -0.01 | -0.02 | -0.01 | 0.00  | -0.02 | 0.00  | 0.00  |
| IRF (PD–PI)                | -0.08      | -0.04 | -0.07 | -0.03 | -0.01 | -0.06 | 0.01  | -0.02 |
|                            | CAS        | SAS   | EAS   | RBU   | PAN   | ROW   | VOL   | DMS   |
| Incremental IRF            | 0.00       | 0.00  | -0.03 | -0.01 | -0.01 | -0.04 | -0.06 | -0.23 |
| IRF (PD–PI)                | -0.01      | 0.00  | -0.12 | -0.06 | -0.05 | -0.20 |       |       |
|                            | Efficiency |       |       |       |       |       |       |       |
|                            | NAM        | CAM   | SAM   | EUR   | NAF   | SAF   | MDE   | SEA   |
| Incremental IRF efficiency | -22.8      | -19.8 | -50.3 | -6.6  | -6.2  | -28.7 | -1.7  | -14.1 |
| IRF efficiency             | -26.3      | -25.0 | -44.7 | -9.5  | -7.9  | -22.4 | 3.5   | -11.9 |
|                            | CAS        | SAS   | EAS   | RBU   | PAN   | ROW   | VOL   | DMS   |
| Incremental IRF efficiency | -8.7       | -3.7  | -7.8  | -11.8 | -77.3 | -18.6 | -22.5 | -63.2 |
| IRF efficiency             | -11.5      | -0.3  | -6.6  | -18.7 | -86.6 | -18.1 |       |       |

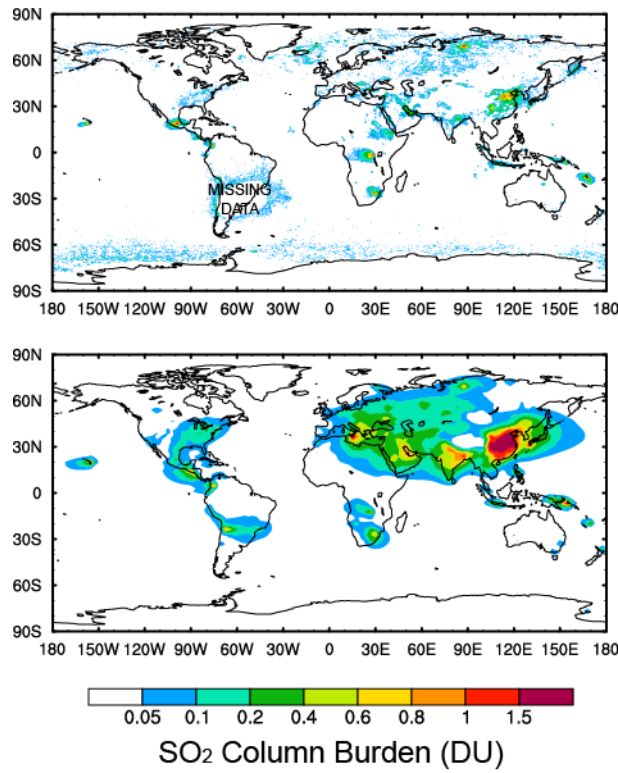

72  
73  
74  
75  
76  
77  
78  
79

**Figure S1.** Spatial distribution of annual mean column burden of SO<sub>2</sub> (units: DU) derived from Ozone Monitoring Instrument (OMI) measurements (top panel) and model (bottom panel) over years of 2010–2014.



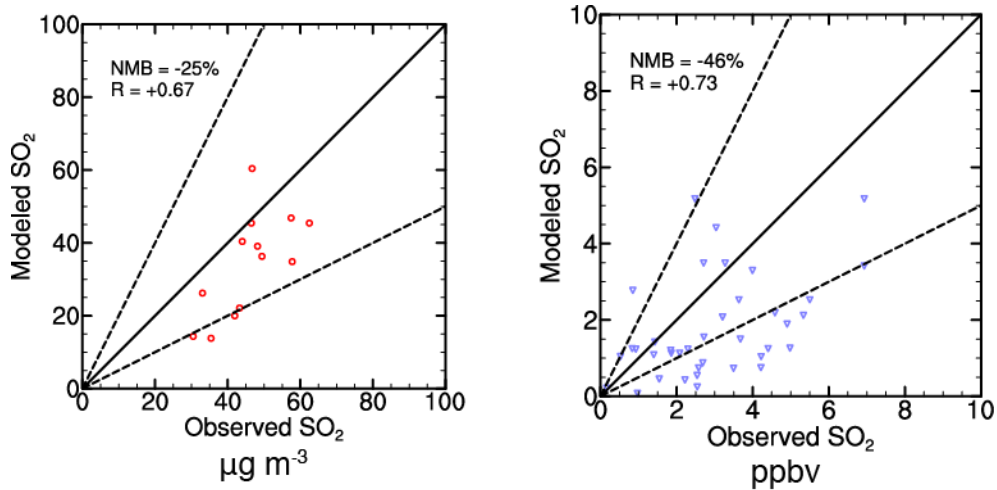

80  
 81  
 82  
 83  
 84  
 85  
 86  
 87  
 88

**Figure S2.** Scatter plot between the simulated and observed annual mean near-surface SO<sub>2</sub> concentrations over (a) China and (b) part of East Asia and Southeast Asia (EANET sites). Observed SO<sub>2</sub> surface Concentrations are over years 2000–2012 in China and 2010–2014 for EANET sites, and simulated values are over years 2010–2014.

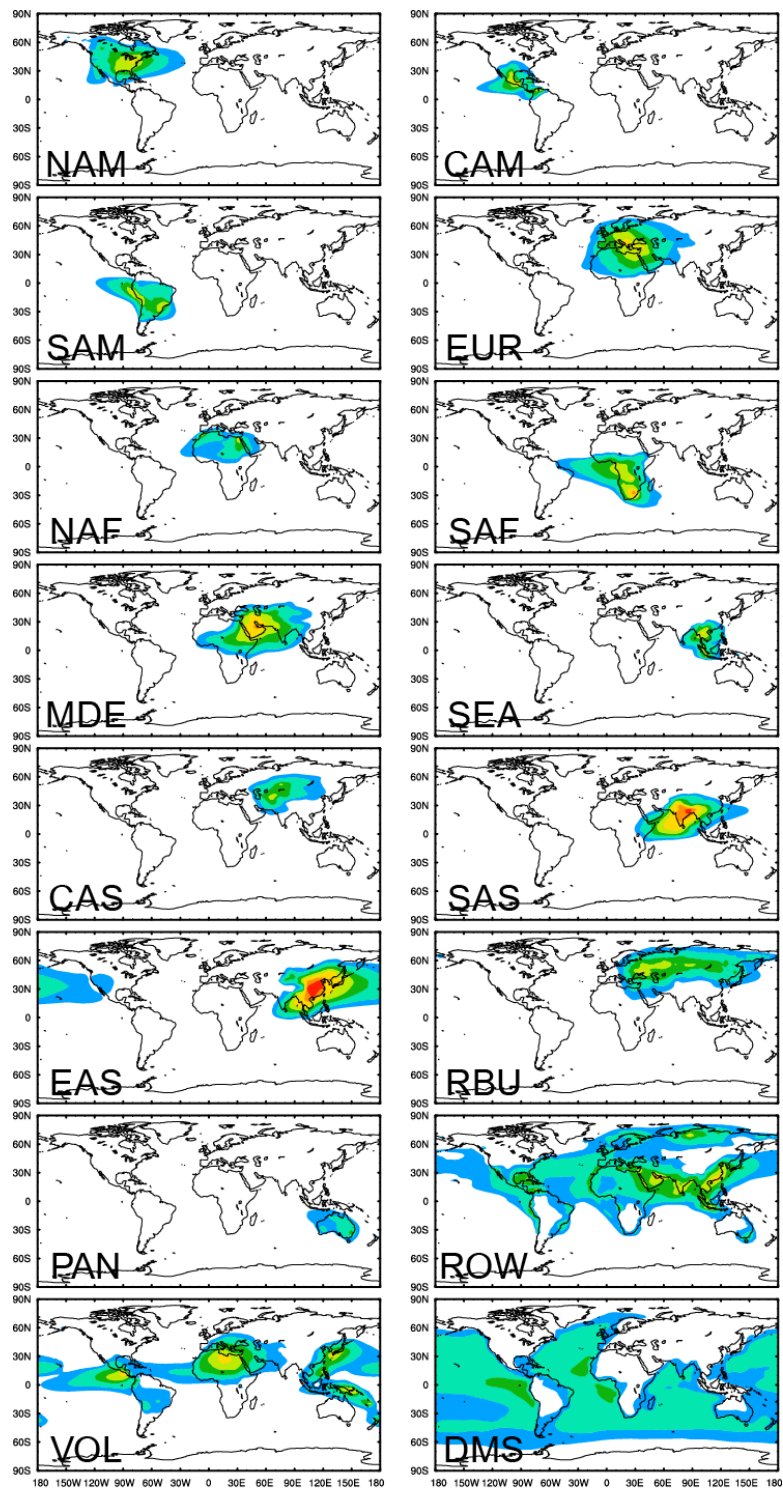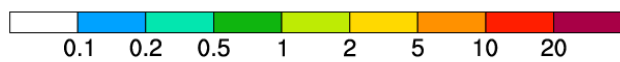

Sulfate Conc. from Each Source ( $\mu\text{g m}^{-3}$ )

89  
90

91 **Figure S3.** Spatial distribution of contributions to annual mean near-surface sulfate  
92 concentrations (unit:  $\mu\text{g m}^{-3}$ ) from each of the tagged source region/sector.

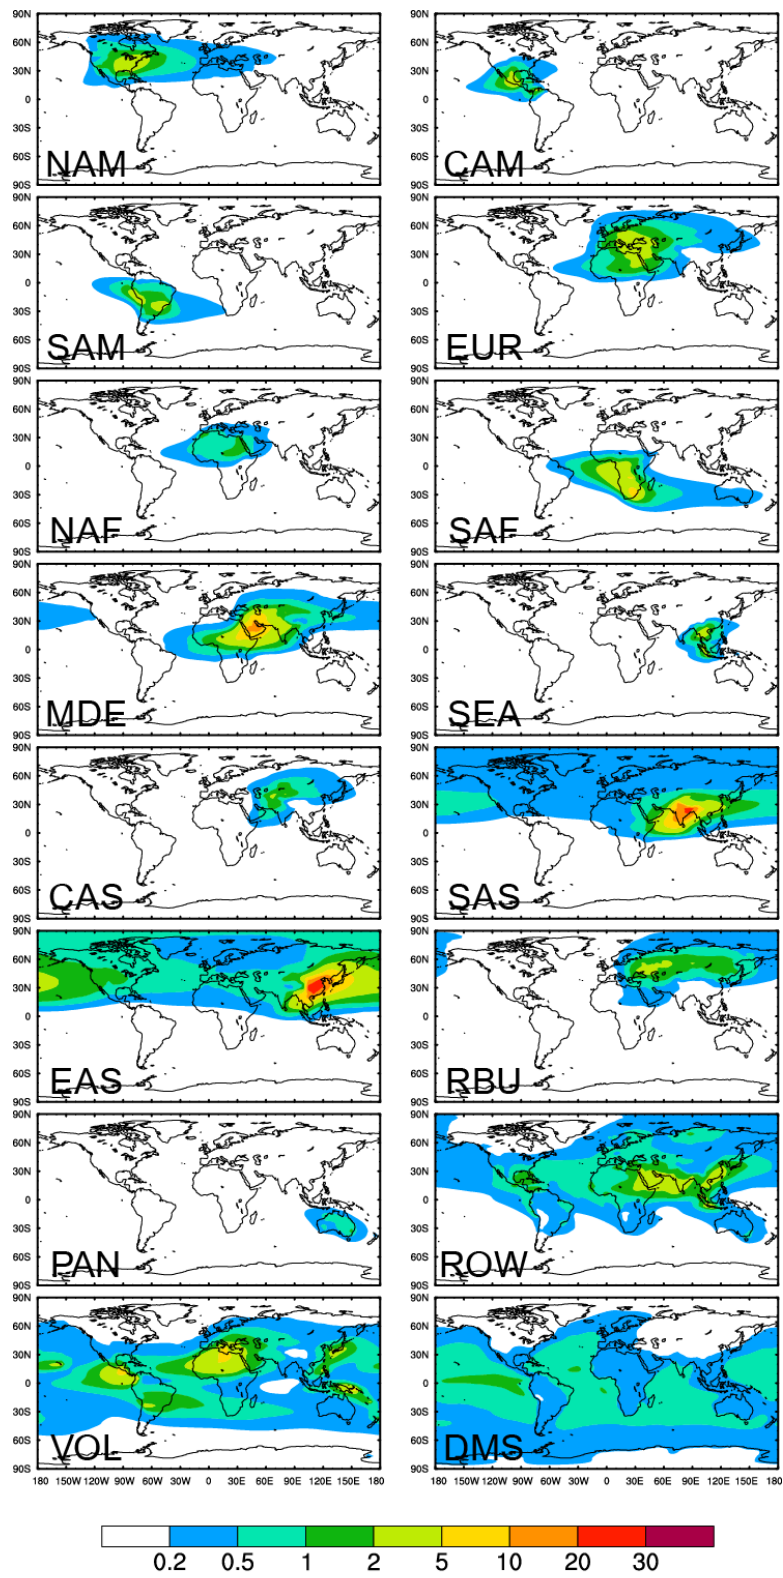

93  
94  
95  
96  
97

**Figure S4.** Spatial distribution of contributions to annual mean column burden of sulfate (unit:  $\text{mg m}^{-2}$ ) from each of the tagged source region/sector.

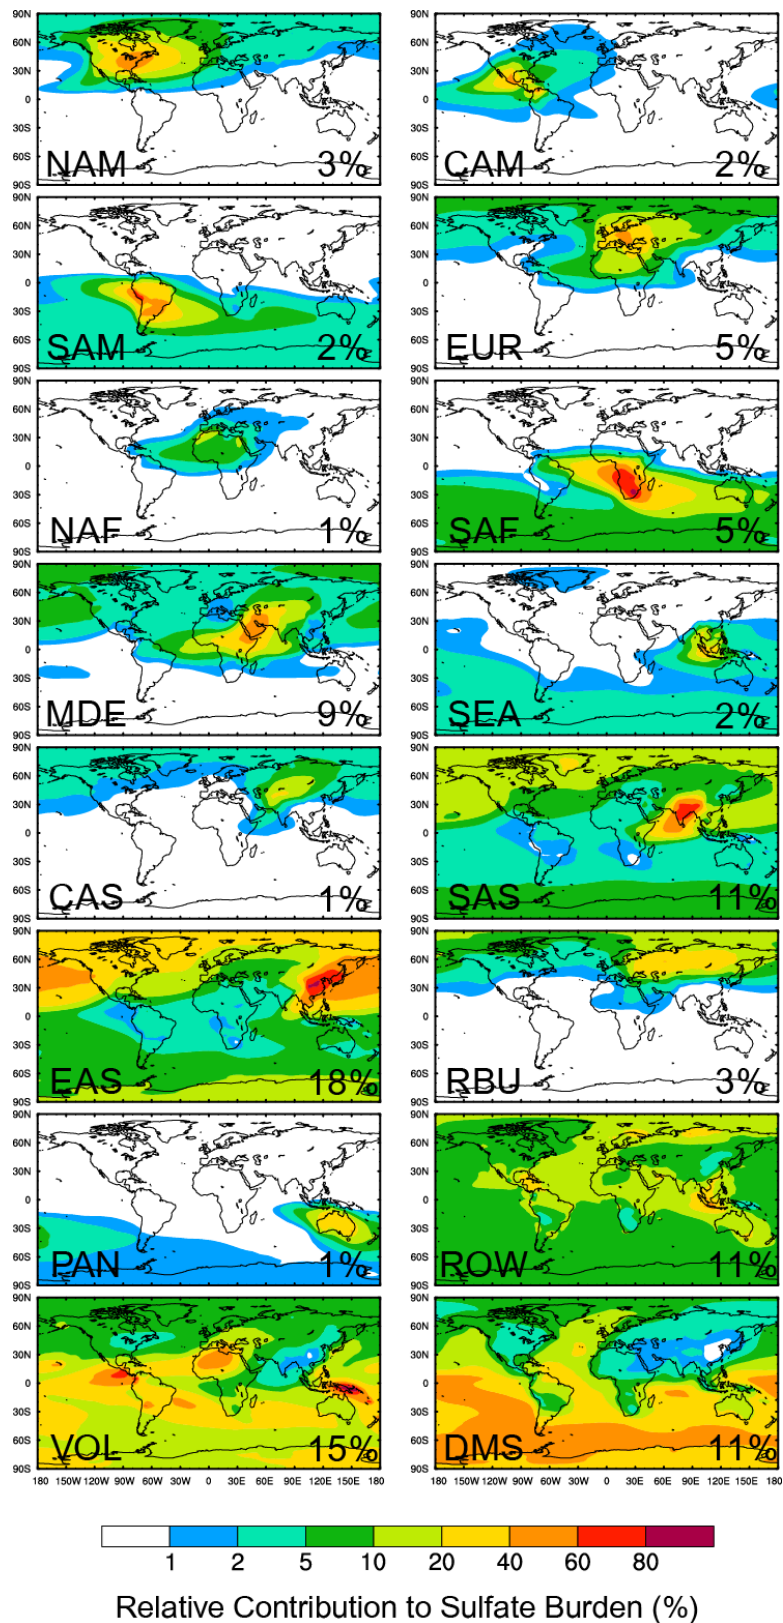

98  
99

100 **Figure S5.** Spatial distribution of relative contributions (%) to annual mean column  
 101 burden of sulfate from each of the tagged source region/sector. Relative contributions  
 102 to global averaged sulfate from individual source regions/sectors is shown at the  
 103 bottom right of each panel.

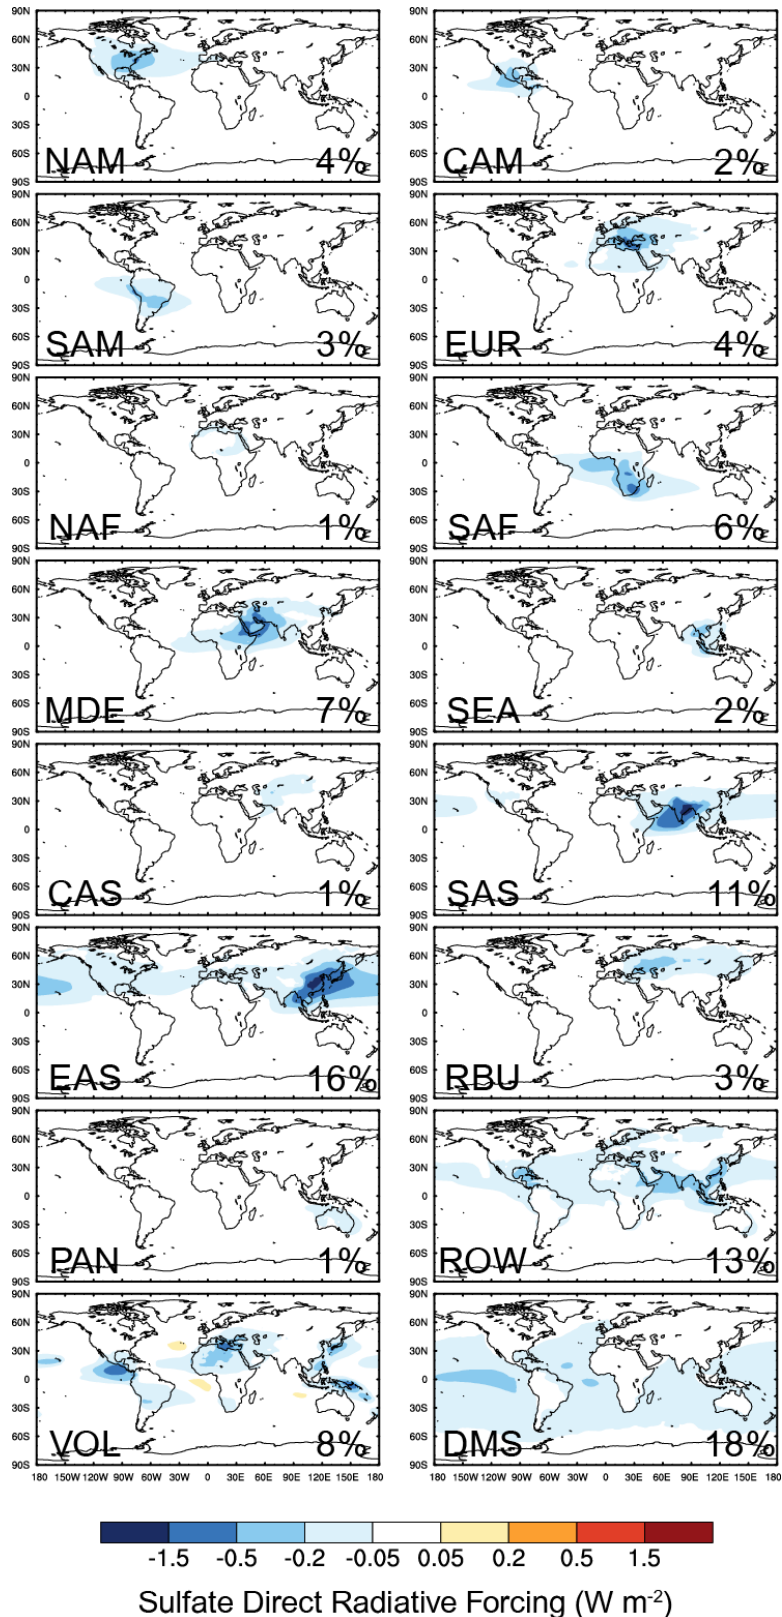

104  
105

106 **Figure S6.** Spatial distribution of contributions to annual mean direct radiative forcing  
 107 of sulfate (unit:  $W m^{-2}$ ) from each of the tagged source region/sector. Relative  
 108 contributions to global averaged direct radiative forcing of sulfate from individual  
 109 source regions/sectors is shown at the bottom right of each panel.

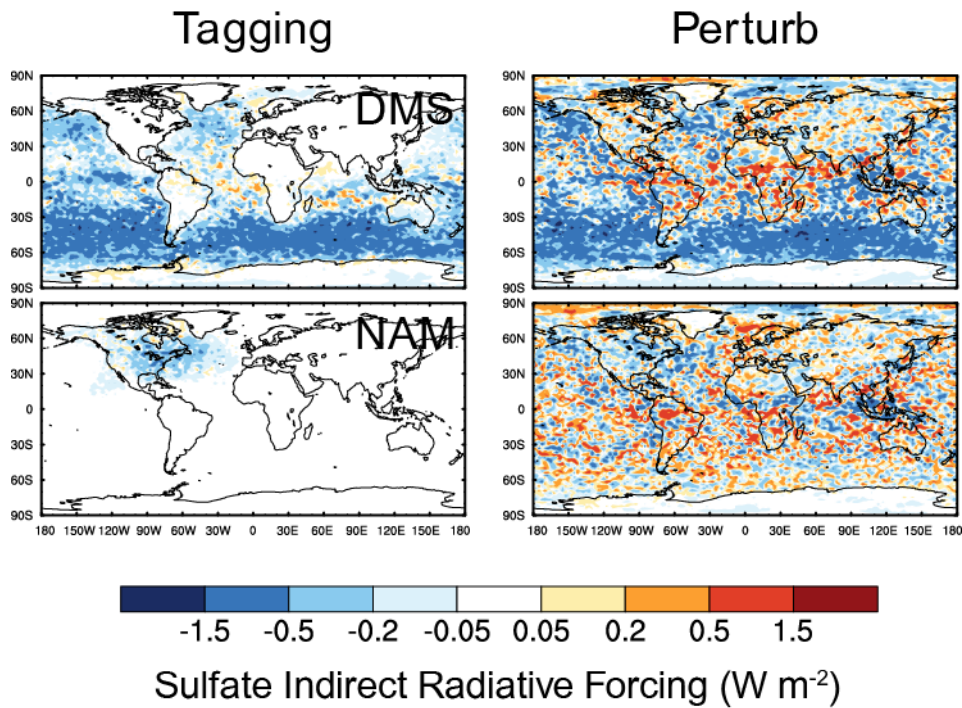

110  
111  
112  
113  
114  
115  
116

**Figure S7.** Spatial distribution of responses of annual mean IRF of sulfate ( $\text{W m}^{-2}$ ) to a 20% reduction in sulfur emissions from the decomposition using sulfur tagging method (left panels) and simple 20% regional/source perturbation (right) for source from DMS (top panels) and North America (bottom panels).

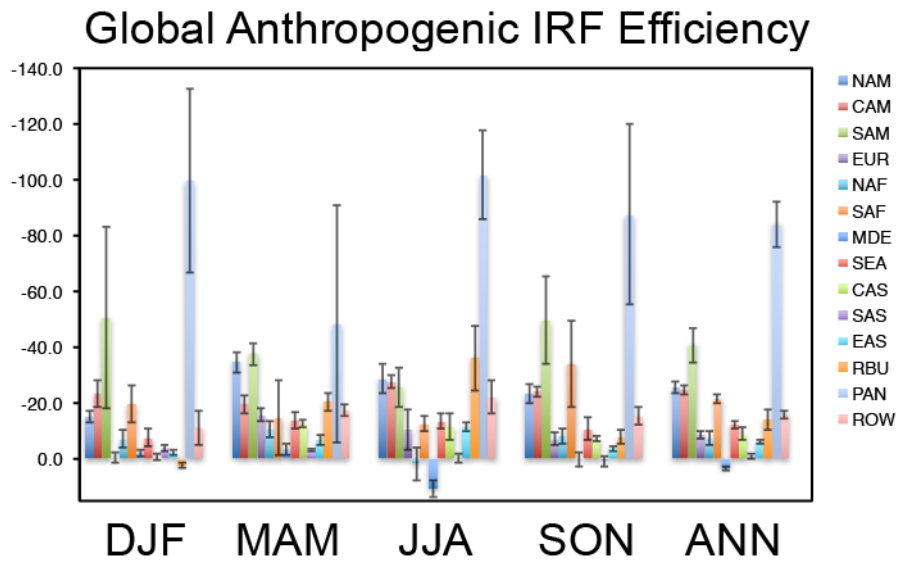

117  
 118  
 119  
 120  
 121  
 122  
 123  
 124

**Figure S8.** Seasonal and annual mean global anthropogenic sulfate indirect radiative forcing efficiency ( $\text{mW m}^{-2} (\text{Tg S yr}^{-1})^{-1}$ ) of the fourteen tagged source regions calculated based on present-day and preindustrial condition simulations.
